# Supplementary material for: Oligomerisation and stereoselective polymerisation of alkenes and alkynes using pyridyl-based Al( iii ) catalysts
Source: Royal Society of Chemistry journal article supplement (doi:10.1039/d5sc07624b), 2026-01-01
Supplement: d5sc07624b1.pdf [file d5sc07624b1.pdf]

## **Oligomerisation and Stereoselective Polymerisation of Alkenes and Alkynes Using Pyridyl-based Al(III) Catalysts**

Dipanjana Choudhury,<sup>†,a</sup> Richard Danylyuk,<sup>†,a</sup> Alexandros Terzopoulos,<sup>a</sup> Natalie S. Potter,<sup>a</sup> Oren A. Scherman,<sup>\*,a</sup> Jonathan M. Goodman<sup>\*a</sup> and Dominic S. Wright<sup>\*a</sup>

<sup>a</sup>Yusuf Hamied Department of Chemistry, University of Cambridge, Lensfield Rd, Cambridge CB2 1EW (U.K.); e-mail: [oas23@cam.ac.uk](mailto:oas23@cam.ac.uk), [mgl1@cam.ac.uk](mailto:mgl1@cam.ac.uk), [dsw1000@cam.ac.uk](mailto:dsw1000@cam.ac.uk).

<sup>†</sup>Both authors should be considered first author of this paper.

## Table of Contents

|                                                     |           |
|-----------------------------------------------------|-----------|
| <b>Experimental details .....</b>                   | <b>3</b>  |
| <b>Additional NMR spectra.....</b>                  | <b>12</b> |
| <b>IR spectra .....</b>                             | <b>14</b> |
| <b>SEC traces.....</b>                              | <b>15</b> |
| <b>DSC thermal analysis .....</b>                   | <b>23</b> |
| <b>Computational methods .....</b>                  | <b>29</b> |
| <b>Fluoride ion affinities (FIA) .....</b>          | <b>30</b> |
| <b>Qualitative molecular surface analysis .....</b> | <b>31</b> |
| <b>Stereochemistry of chain transfer .....</b>      | <b>32</b> |
| <b>Enthalpy profile for polymerisation.....</b>     | <b>32</b> |
| <b>NBO calculations.....</b>                        | <b>33</b> |
| <b>Scans for barrierless steps.....</b>             | <b>34</b> |
| <b>Ring closing .....</b>                           | <b>35</b> |
| <b>Alternative regioselectivity.....</b>            | <b>38</b> |
| <b>Geometry of alkene.....</b>                      | <b>39</b> |
| <b>Elimination pathway.....</b>                     | <b>40</b> |

## Experimental details

All synthetic processes were performed using standard Schlenk techniques under a dry nitrogen atmosphere using oven-dried glassware. Starting materials were acquired from commercial suppliers (Aldrich, Acros Organics, Alfa Aesar, Manchester Organics and Fluorochem) and used as received, unless otherwise specified. Toluene and *n*-hexane were dried using sodium and distilled under nitrogen, acetonitrile and DCM were dried over calcium hydride and stored over 4 Å molecular sieves, and THF was distilled over sodium/benzophenone. Low temperatures in syntheses were attained using a dry ice/acetone (−78 °C) or a dry ice/ethylene glycol (−15 °C) bath. All air-sensitive materials were handled in a nitrogen-filled glovebox (Saffron type α). <sup>1</sup>H, <sup>13</sup>C, <sup>27</sup>Al, <sup>11</sup>B, and <sup>19</sup>F NMR spectra were recorded on a Bruker Avance III HD 500 MHz Smart Probe spectrometer; higher-resolution <sup>1</sup>H (with dynamic flip angle control based on *T*<sub>1</sub> relaxation) and <sup>13</sup>C NMR spectra were recorded on a Bruker Avance III HD 700 MHz TXO Cryoprobe spectrometer. For <sup>1</sup>H and <sup>13</sup>C NMR, chemical shifts are internally referenced to the deuterated solvent and calculated relative to TMS. The internal reference standard used for <sup>27</sup>Al NMR was AlCl<sub>3</sub>·6H<sub>2</sub>O, for <sup>11</sup>B NMR BF<sub>3</sub>·OEt<sub>2</sub> in CDCl<sub>3</sub>, and for <sup>19</sup>F NMR neat CFCl<sub>3</sub>. Single-Crystal X-ray diffraction data were obtained using either a Bruker D8-QUEST PHOTON-100 diffractometer (Cu-Kα, λ = 1.54178 Å) or a Nonis KappaCCD diffractometer (Mo-Kα, λ = 0.71073 Å). Polymer molecular weights and molecular weight distributions were assessed using a DMF GPC method. DMF GPC was performed on a series of three SUPREMA (100Å, 3000Å and 3000Å) columns with an SPD-M20A prominence diode array detector and RID-20A refractive index detector (both Shimadzu) calibrated in relation to polystyrene standards. Samples were filtered through a 0.2 µm PTFE filters before injection. The GPC eluent was HPLC-grade DMF containing 1g/L LiBr at a flow rate of 1.0 ml/min. The small molecule LCMS analysis was conducted on the mass spectrometer Xevo G2-S coupled with UPLC system. The column used for the LC was Acquity UPLC BEHC18 with dimensions 2.1 mm × 50 mm. The gradient for the method was: Time 0 min, Flow rate 0.2 mL/min for composition 95% A solution (Water with 0.1 % Formic acid) and 5% B (Acetonitrile), Time 1.00, 95% A and 5% B, Time 5 min, 0% A and 100% B, Time 6 min 0% A and 100% B and time 7 min 95% A and 5% B. The data were processed by MassLynx software that controls LCMS analysis and runs Xevo. Fourier transform infrared spectroscopy (FTIR) spectra were collected on a Thermo Scientific Nicolet iS50 FTIR spectrometer (ATR mode) in the range of 400 to 4000 cm<sup>−1</sup>. Omnic software was used for analysis. Differential scanning calorimetry (DSC) was conducted on a Discovery 2500

instrument manufactured by TA Instruments (Waters). For polystyrene samples, the measurements were conducted in the Modulated Conventional mode with a modulated temperature amplitude of 1 °C, a modulation period of 120 s, ramp rate of 5 °C/min from 0 °C to 300 °C. For poly(1-hexene) and polycyclohexene samples, the measurements were conducted in the Modulated Conventional mode with a modulated temperature amplitude of 1 °C, a modulation period of 120 s, ramp rate of 5 °C/min from -90 °C to 200 °C.

*Polymerisation of styrene (NMR-scale):* Dimer **1a** (56.7 mg, 0.211 mmol) and  $[\text{Ph}_3\text{C}][\text{B}(\text{C}_6\text{F}_5)_4]$  (194 mg, 0.211 mmol) were dissolved in  $d_8$ -toluene (~ 0.7 mL) in a J Young NMR tube. Styrene was added according to the desired catalytic loading of cation **2a** (10 mol%: 2.1 mmol, 0.22 mL; 5 mol%: 4.2 mmol, 0.48 mL; 2.5 mol%: 8.4 mmol, 0.96 mL) and the reaction was maintained at 100 °C overnight under a  $\text{N}_2$  atmosphere. For the 0.5 mol% catalytic loading, the reaction was conducted at a 0.105 mmol-scale bearing the overall volume of the NMR tube in mind (dimer **1a**: 28.38 mg;  $[\text{Ph}_3\text{C}][\text{B}(\text{C}_6\text{F}_5)_4]$ : 96.85 mg; styrene: 21 mmol, 2.4 mL). *In-situ*  $^1\text{H}$  NMR (500 MHz, 25 °C,  $d_8$ -toluene):  $\delta$  7.02–7.13 (mult, 3H, H(2)–H(4)), 6.45–6.94 (mult, bd, 2H, H(1) & H(5)), 0.98–1.84 (mult, bd, 2H, H(7) & H(8)) ppm.  $^{13}\text{C}$  NMR (126 MHz, 25 °C,  $d_8$ -toluene):  $\delta$  149.1 (Ph), 145–146.8 (bd, C(6)), 137 (Ph), 128.0 (C(1) & C(5)), 127.9 (C(2) & C(4)), 125.9 (C(3)), 40.6 (C(7)), 41.5–47 (C(8)) ppm.  $^{11}\text{B}$  NMR (25 °C,  $d_8$ -toluene, 160 MHz):  $\delta$  -16 ppm.  $^{19}\text{F}$  NMR (25 °C,  $d_8$ -toluene, 471 MHz):  $\delta$  -132.3, -163.1, -167.1 ppm. GPC:  $M_n$  = 1689 g mol<sup>-1</sup>,  $M_w$  = 3595 g mol<sup>-1</sup>,  $\bar{D}$  = 2.1.

*Polymerisation of styrene using dimer 1a (cation 2a):* Dimer **1a** (28.38 mg, 0.105 mmol) and  $[\text{Ph}_3\text{C}][\text{B}(\text{C}_6\text{F}_5)_4]$  (96.85 mg, 0.105 mmol) were dissolved in toluene (~ 1–2 mL). Styrene was added dropwise according to the desired catalytic loading of cation **2a** (10 mol%: 1.05 mmol, 0.12 mL; 5 mol%: 2.1 mmol, 0.24 mL; 2.5 mol%: 4.2 mmol, 0.48 mL; 0.5 mol%: 21 mmol, 2.4 mL) and the reaction was stirred for one hour at room temperature. The reaction was quenched using a few drops of dry MeOH. The solvent was taken off *in vacuo*, leaving behind a “plastic”-like solid. The procedure was repeated at -15 °C.  $^1\text{H}$  NMR (500 MHz, 25 °C,  $d_8$ -toluene):  $\delta$  7.01–7.16 (mult, 3H, H(2)–H(4)), 6.43–6.96 (mult, bd, 2H, H(1) & H(5)), 0.97–1.82 (mult, bd, 2H, H(7) & H(8)) ppm.  $^{13}\text{C}$  NMR (126 MHz, 25 °C,  $d_8$ -toluene):  $\delta$  144.3–146.8 (bd, C(6)), 137 (Ph), 128.0 (C(1) & C(5)), 127.7 (C(2) & C(4)), 125.2 (C(3)), 41.3–46.7 (C(7)), 40.6 (C(8)) ppm. GPC:  $M_n$  = 1689 g mol<sup>-1</sup>,  $M_w$  = 3595 g mol<sup>-1</sup>,  $\bar{D}$  = 2.1 (2.5 mol%, RT);  $M_n$  =

2191 g mol<sup>-1</sup>,  $M_w$  = 6514 g mol<sup>-1</sup>,  $\bar{D}$  = 2.9 (0.5 mol%, RT);  $M_n$  = 5142 g mol<sup>-1</sup>,  $M_w$  = 6030 g mol<sup>-1</sup>,  $\bar{D}$  = 1.2 (2.5 mol%, -15 °C);  $M_n$  = 5103 g mol<sup>-1</sup>,  $M_w$  = 8687 g mol<sup>-1</sup>,  $\bar{D}$  = 1.7 (0.5 mol%, -15 °C).

*Polymerisation of styrene using dimer 1e (cation 2e):* Dimer **1e** (49 mg, 0.105 mmol) and [Ph<sub>3</sub>C][B(C<sub>6</sub>F<sub>5</sub>)<sub>4</sub>] (96.85 mg, 0.105 mmol) were dissolved in toluene (~ 1–2 mL). Styrene was added dropwise according to the desired catalytic loading of cation **2e** (10 mol%: 1.05 mmol, 0.12 mL; 5 mol%: 2.1 mmol, 0.24 mL; 2.5 mol%: 4.2 mmol, 0.48 mL; 0.5 mol%: 21 mmol, 2.4 mL) and the reaction was stirred for 48 h (1 h for the 10 mol% case) at -15 °C. The reaction was quenched using a few drops of dry MeOH. The solvent was taken off *in vacuo*, leaving behind a “plastic”-like solid in combination with a more “powdery” solid. Yield 898.8 mg, 41%. TON: 82. <sup>1</sup>H NMR (500 MHz, 25 °C, d<sub>8</sub>-toluene): δ 7.01–7.15 (mult, 3H, H(2)–H(4)), 6.45–6.95 (mult, bd, 2H, H(1) & H(5)), 0.97–1.73 (mult, bd, 2H, H(7) & H(8)) ppm. <sup>13</sup>C NMR (126 MHz, 25 °C, d<sub>8</sub>-toluene): δ 144.4–146.8 (bd, C(6), atactic), 143.9 (C(6), syndiotactic) 137 (Ph), 128.0 (C(1) & C(5)), 127.7 (C(2) & C(4)), 125.2 (C(3)), 40.2–46.8 (C(7) & C(8), syndiotactic+atactic) ppm. GPC:  $M_n$  = 2613 g mol<sup>-1</sup>,  $M_w$  = 3195 g mol<sup>-1</sup>,  $\bar{D}$  = 1.2 (10 mol%, -15 °C);  $M_n$  = 2045 g mol<sup>-1</sup>,  $M_w$  = 5307 g mol<sup>-1</sup>,  $\bar{D}$  = 2.6 (5 mol%, -15 °C);  $M_n$  = 1411 g mol<sup>-1</sup>,  $M_w$  = 2959 g mol<sup>-1</sup>,  $\bar{D}$  = 2.1 (2.5 mol%, -15 °C);  $M_n$  = 5123 g mol<sup>-1</sup>,  $M_w$  = 10376 g mol<sup>-1</sup>,  $\bar{D}$  = 2.0 (0.5 mol%, -15 °C). IR (cm<sup>-1</sup>): 3057, 3028, 2918, 2844, 1603, 1492, 1451, 1258, 1079, 1025, 759, 696, 538.

For 2.5 mol% loading, <sup>13</sup>C NMR (126 MHz, 25 °C, d<sub>8</sub>-toluene): δ 146.9 (C(6), isotactic), 146.5 (C(6), isotactic) 144.8–146.3 (bd, C(6), atactic), 143.9 (C(6), syndiotactic), 137 (Ph), 128.0–128.1 (C(1) & C(5)), 127.7 (C(2) & C(4)), 125.2–126.1 (C(3)), 48.5 (MeOH), 44.2 (C(8), syndiotactic), 40.1–41.2, 37.44 (C(7)) ppm.

*Polymerisation of styrene using dimer 1b (cation 2b):* Dimer **1b** (31.33 mg, 0.105 mmol) and [Ph<sub>3</sub>C][B(C<sub>6</sub>F<sub>5</sub>)<sub>4</sub>] (96.85 mg, 0.105 mmol) were dissolved in toluene (~ 1–2 mL) to achieve a catalytic loading of 0.5 mol%. Styrene was added dropwise (21 mmol, 2.4 mL) and the reaction was stirred for 1 h at 0 °C. The reaction was quenched using a few drops of dry MeOH. The solvent was taken off *in vacuo*, leaving behind a mass of “plastic”-like solid. Yield 1795.3 mg, 82%. TON: 164. <sup>1</sup>H NMR (500 MHz, 25 °C, d-chloroform): δ 7.29–7.51 (mult, 3H, H(2)–H(4)), 6.64–6.99 (mult, bd, 2H, H(1) & H(5)), 2.59 (py substituent, CH<sub>3</sub>), 1.25–2.28 (mult, bd,

2H, H(7) & H(8)) ppm.  $^{13}\text{C}$  NMR (126 MHz, 25 °C,  $d_8$ -toluene):  $\delta$  145.0–146.8 (bd, C(6), atactic), 137.94 (Ph), 128.2 (C(1) & C(5)), 127.8 (C(2) & C(4)), 125.5 (C(3)), 40.3–46.1 (C(7) & C(8), atactic), 21.63 (py substituent,  $\text{CH}_3$ ) ppm. GPC:  $M_n = 2118 \text{ g mol}^{-1}$ ,  $M_w = 10740 \text{ g mol}^{-1}$ ,  $D = 5.0$ .

*Polymerisation of styrene using dimer 1c (cation 2c):* Dimer **1c** (31.33 mg, 0.105 mmol) and  $[\text{Ph}_3\text{C}][\text{B}(\text{C}_6\text{F}_5)_4]$  (96.85 mg, 0.105 mmol) were dissolved in toluene ( $\sim 1\text{--}2 \text{ mL}$ ) to achieve a catalytic loading of 0.5 mol%. Styrene was added dropwise (21 mmol, 2.4 mL) and the reaction was stirred for 1 h at 0 °C. The reaction was quenched using a few drops of dry MeOH. The solvent was taken off *in vacuo*, leaving behind a mass of “plastic”-like solid (Figure S1). Yield 1446.2 mg.  $^1\text{H}$  NMR (500 MHz, 25 °C,  $d$ -chloroform):  $\delta$  7.31–7.54 (mult, 3H, H(2)–H(4)), 6.79–7.13 (mult, bd, 2H, H(1) & H(5)), 2.70 (py substituent,  $\text{OCH}_3$ ), 1.39–2.46 (mult, bd, 2H, H(7) & H(8)) ppm.  $^{13}\text{C}$  NMR (126 MHz, 25 °C,  $d$ -chloroform):  $\delta$  145.2–146.7 (bd, C(6), atactic), 138.0 (Ph), 128.4 (C(1) & C(5)), 127.9 (C(2) & C(4)), 126.0 (C(3)), 40.5–47.3 (C(7) & C(8), atactic), 21.8 (py substituent,  $\text{OCH}_3$ ) ppm. GPC:  $M_n = 3515 \text{ g mol}^{-1}$ ,  $M_w = 13602 \text{ g mol}^{-1}$ ,  $D = 3.9$ . IR ( $\text{cm}^{-1}$ ): 3059, 3024, 2921, 2845, 1601, 1492, 1452, 1079, 1027, 756, 695, 537.

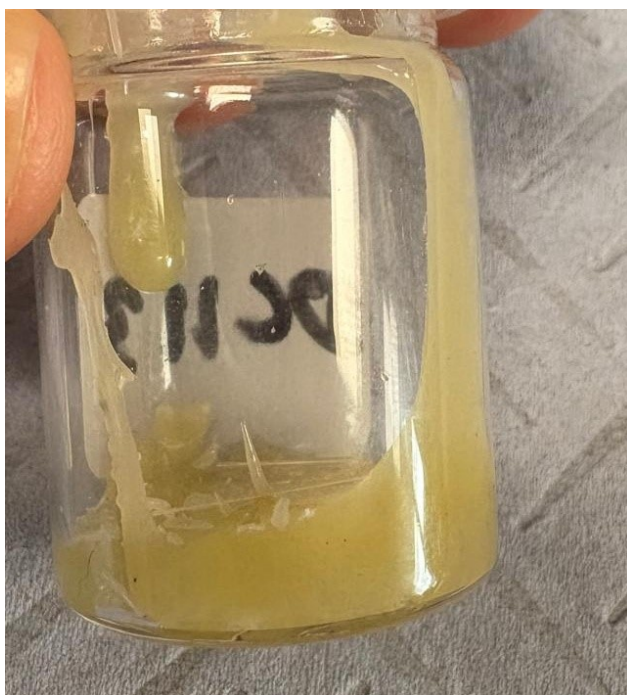

**Figure S1.** Image of atactic polymeric product obtained using cation **2c**.

*Polymerisation of styrene using dimer 1f (cation 2f):* Dimer **1f** (52.36 mg, 0.105 mmol) and  $[\text{Ph}_3\text{C}][\text{B}(\text{C}_6\text{F}_5)_4]$  (96.85 mg, 0.105 mmol) were dissolved in toluene (~ 1–2 mL) to achieve a catalytic loading of 0.5 mol%. Styrene was added dropwise (21 mmol, 2.4 mL) and the reaction was stirred for 1 h at 0 °C. The reaction was quenched using a few drops of dry MeOH. The solvent was taken off *in vacuo*, leaving behind a mass of “plastic”-like solid in combination with a more “powdery” solid (Figure S2). Yield 1070.7 mg, 50%. TON: 100.  $^1\text{H}$  NMR (500 MHz, 25 °C, d-chloroform):  $\delta$  7.33–7.53 (mult, 3H, H(2)–H(4)), 6.72–7.13 (mult, bd, 2H, H(1) & H(5)), 2.65 (py substituent,  $\text{OCH}_3$ ), 1.32–2.59 (mult, bd, 2H, H(7) & H(8)) ppm.  $^{13}\text{C}$  NMR (126 MHz, 25 °C, d-chloroform):  $\delta$  144.9–146.8 (bd, C(6), atactic), 143.9 (C(6), syndiotactic), 138.0 (Ph), 128.5 (C(1) & C(5)), 128.0 (C(2) & C(4)), 125.9 (C(3)), 40.6–47.0 (C(7) & C(8), syndiotactic+atactic), 21.7 (py substituent,  $\text{OCH}_3$ ) ppm. GPC:  $M_n = 1961 \text{ g mol}^{-1}$ ,  $M_w = 5929 \text{ g mol}^{-1}$ ,  $D = 3.0$ . IR ( $\text{cm}^{-1}$ ): 3061, 3025, 2923, 2847, 1601, 1493, 1452, 1260, 1081, 1025, 756, 695, 539.

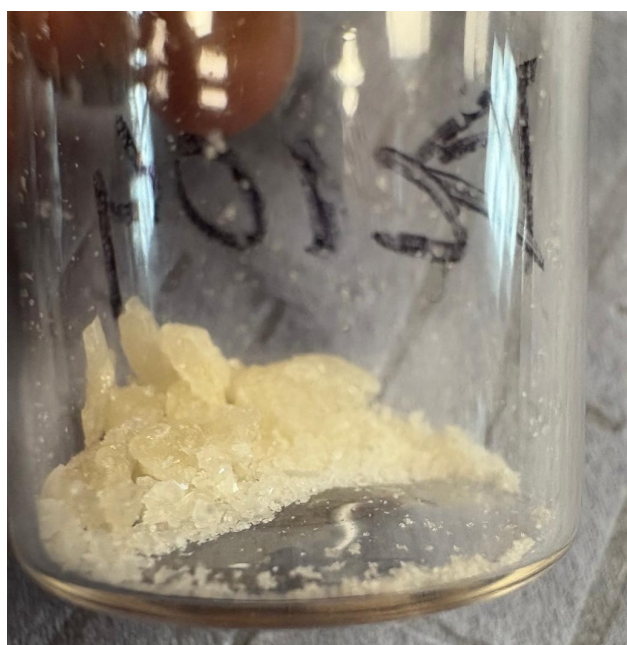

**Figure S2.** Image of syndiotactic + atactic polymeric product obtained using cation **2f**.

*Control reaction for polymerisation using only  $[\text{Ph}_3\text{C}][\text{B}(\text{C}_6\text{F}_5)_4]$ :*  $[\text{Ph}_3\text{C}][\text{B}(\text{C}_6\text{F}_5)_4]$  (96.85 mg, 0.105 mmol) was dissolved in  $d_8$ -toluene (~ 0.7 mL) in a J Young NMR tube. Styrene was added to achieve a catalytic loading of 10 mol% (1.05 mmol, 0.12 mL) and the reaction was sonicated for 1 h at room temperature. The reaction was quenched using a few drops of dry MeOH. All volatiles were removed *in vacuo* 0 °C, leaving behind a mass of “plastic”-like solid. The  $^{13}\text{C}$  NMR spectrum (126 MHz, 25 °C, d-chloroform) is shown in Figure S5 (with resonances for atactic polystyrene highlighted). GPC:  $M_n = 2464$ ,  $D = 2.3$ .

*Trimerisation of phenylacetylene using dimer 1a (cation 2a):* Dimer **1a** (28.38 mg, 0.105 mmol) and  $[\text{Ph}_3\text{C}][\text{B}(\text{C}_6\text{F}_5)_4]$  (96.85 mg, 0.105 mmol) was dissolved in 2 mL of THF to achieve a catalytic loading of 0.5 mol%. Phenylacetylene was added (21 mmol, 2.31 mL) and the reaction was stirred at room temperature for 3 h. The resulting brown solution was quenched with excess MeOH; the solvents were removed *in vacuo*, and the product was a brownish-white solid. Yield 178.0 mg, 8.3%, TON: 17

1,2,4-triphenylbenzene:

$^1\text{H}$  NMR (500 MHz, 25 °C, d-chloroform):  $\delta$  7.54–7.68 (mult, bd, 4H, H(1), H(4), H(15) & H(19)), 7.53 (s, 1H, H(24)), 7.45–7.50 (mult, bd, 2H, H(10) & H(20)), 7.37 (mult, bd, 1H, H(14)), 7.16–7.31 (mult, H(2), H(11)–H(13), H(16)–H(18) & H(21)–H(23)) ppm.  $^{13}\text{C}$  NMR (126 MHz, 25 °C, d-chloroform):  $\delta$  143.8 (C(7) & C(8)), 142.5 (C(9)), 133.7 (C(3) & C(5)), 132.0 (C(6)), 129.4 (C(11), C(13), C(16), C(18), C(21) & C(23)), 128.7 (C(1)), 128.2 (C(10), C(14), C(15), C(19), C(20) & C(24)), 127.8 (C(12), C(17) & C(22)), 126.8 (C(4)), 126.2 (C(2)) ppm.

1,3,5-triphenylbenzene:

$^1\text{H}$  NMR (500 MHz, 25 °C, d-chloroform):  $\delta$  7.84 (s, 3H, H(1), H(3) & H(5)), 7.75 (mult, 6H, H(10), H(14), H(15), H(19), H(20), H(24)), 7.52 (mult, bd, 6H, H(11), H(13), H(16), H(18), H(21) & H(23)), 7.37 (mult, bd, 1H, H(14)), 7.37–7.46 (mult, bd, H(12), H(17) & H(22)) ppm.  $^{13}\text{C}$  NMR (126 MHz, 25 °C, d-chloroform):  $\delta$  140.7 (C(7)–C(9)), 137.0 (C(2), C(4) & C(6)), 129.9 (C(11), C(13), C(16), C(18), C(21) & C(23)), 127.6 (C(10), C(14), C(15), C(19), C(20) & C(24)), 127.2 (C(12), C(17) & C(22)), 125.9 (C(1), C(3) & C(5)) ppm.

IR( $\text{cm}^{-1}$ ): 3062, 3021, 2964, 1642, 1596, 1512, 1460, 1273, 1081, 1053, 976, 755, 699, 571.

MS  $[\text{M}+\text{H}]^+$ : found: 307.1477, theoretical: 307.1487.

*Trimerisation of phenylacetylene using dimer 1f (cation 2f):* Dimer **1f** (52.36 mg, 0.105 mmol) and  $[\text{Ph}_3\text{C}][\text{B}(\text{C}_6\text{F}_5)_4]$  (96.85 mg, 0.105 mmol) was dissolved in 2 mL of THF to achieve a range of catalytic loadings (Table 6.1). Phenylacetylene was added and a variety of reaction conditions were used, which have been tabulated below (Table 6.1). In all cases, the resulting brown solution was quenched with excess MeOH; the solvents were removed *in vacuo*, and the product was a brownish-white solid.



**Table 6.1.** Experimental conditions, yield and TON for the trimerisation of phenylacetylene.

| Loading (mol%) | Amount of phenylacetylene (mL) | Time (h) | Temperature (°C) | Yield (mg) | Percentage yield (%) | TON |
|----------------|--------------------------------|----------|------------------|------------|----------------------|-----|
| 10             | 0.12                           | 2        | 30               | 104.5      | 97.4                 | 10  |
| 5              | 0.23                           | 24       | 30               | 117.6      | 55                   | 11  |
| 2.5            | 0.46                           | 5        | 60               | 171.6      | 40                   | 16  |
| 0.5            | 2.31                           | 3        | RT               | 240.4      | 11                   | 22  |

**1,2,4-triphenylbenzene:**

<sup>1</sup>H NMR (500 MHz, 25 °C, d-chloroform):  $\delta$  7.53–7.81 (mult, bd, 4H, H(1), H(4), H(15) & H(19)), 7.52 (s, 1H, H(24)), 7.42–7.50 (mult, bd, 2H, H(10) & H(20)), 7.36 (mult, bd, 1H, H(14)), 7.14–7.29 (mult, H(2), H(11)–H(13), H(16)–H(18) & H(21)–H(23)) ppm. <sup>13</sup>C NMR (126 MHz, 25 °C, d-chloroform):  $\delta$  143.8 (C(7) & C(8)), 142.5 (C(9)), 132.0 (C(6)), 129.4 (C(11), C(13), C(16), C(18), C(21) & C(23)), 128.7 (C(1)), 128.2 (C(10), C(14), C(15), C(19), C(20) & C(24)), 126.2 (C(2)) ppm. Note that some signals could not be observed in this case.

**1,3,5-triphenylbenzene:**

<sup>1</sup>H NMR (500 MHz, 25 °C, d-chloroform):  $\delta$  7.81 (s, 3H, H(1), H(3) & H(5)), 7.73 (mult, 6H, H(10), H(14), H(15), H(19), H(20), H(24)), 7.51 (mult, bd, 6H, H(11), H(13), H(16), H(18), H(21) & H(23)), 7.39–7.42 (mult, bd, H(12), H(17) & H(22)) ppm. Note that the sample was too dilute for the <sup>13</sup>C NMR signals to be differentiated from the baseline. IR(cm<sup>-1</sup>): 3062, 3020, 2964, 1644, 1599, 1511, 1460, 1276, 1081, 1059, 976, 755, 698, 571. MS [M+H]<sup>+</sup>: found: 307.1485, calculated: 307.1487.

**Literature values for comparison:**<sup>1</sup> 1,2,4-Triphenylbenzene <sup>1</sup>H NMR (300 MHz, CDCl<sub>3</sub>):  $\delta$  7.15-7.22 (m, 10H), 7.37-7.52 (m, 4H), 7.64-7.69 (m, 4H)

1,3,5-Triphenylbenzene <sup>1</sup>H NMR (300 MHz, CDCl<sub>3</sub>):  $\delta$  7.36-7.41 (m, 3H), 7.48 (t, J = 7.6 Hz, 6H), 7.70 (d, J = 7.9 Hz, 6H), 7.79 (s, 3H)

*Trimerisation of t-butylacetylene using dimer 1a (cation 2a):* Dimer **1a** (28.38 mg, 0.105 mmol) and  $[\text{Ph}_3\text{C}][\text{B}(\text{C}_6\text{F}_5)_4]$  (96.85 mg, 0.105 mmol) was dissolved in 2 mL of THF (catalytic loading of 10 mol%). *t*-butylacetylene was added (1.05 mmol, 0.13 mL) and the reaction solution was stirred at 30 °C for 24 h. The reaction was quenched with an excess of MeOH and the resultant light brown solution was removed *via* cannula, leaving behind a brownish-white solid, which was washed with MeOH a few times and dried *in vacuo*. Yield 59.6 mg, 69%. TON: 7. IR ( $\text{cm}^{-1}$ ): 2963, 1644, 1612, 1513, 1461, 1373, 1363, 1259, 1019. MS  $[\text{M}+\text{H}]^+$ : found: 247.2429, calculated: 247.2426.

*Trimerisation of t-butylacetylene using dimer 1f (cation 2f):* Dimer **1f** (52.36 mg, 0.105 mmol) and  $[\text{Ph}_3\text{C}][\text{B}(\text{C}_6\text{F}_5)_4]$  (96.85 mg, 0.105 mmol) was dissolved in 2 mL of THF (catalytic loading of 10 mol%). *t*-butylacetylene was added (1.05 mmol, 0.13 mL) and the reaction solution was stirred at 30 °C for 24 h. The reaction was quenched with an excess of MeOH and the resultant light brown solution was removed *via* cannula, leaving behind a brownish-white solid, which was washed with MeOH a few times and dried *in vacuo*. Yield 52.4 mg, 61%. TON: 6. IR ( $\text{cm}^{-1}$ ): 2960, 1643, 1612, 1590, 1514, 1462, 1374, 1366, 1258, 1021. MS  $[\text{M}+\text{H}]^+$ : found: 247.2429, calculated: 247.2426.

*Polymerisation of 1-hexene using dimer 1a (cation 2a):* To a solution of dimer **1a** (28.38 mg, 0.105 mmol) and  $[\text{Ph}_3\text{C}][\text{B}(\text{C}_6\text{F}_5)_4]$  (96.85 mg, 0.105 mmol) in toluene (3 mL) (10 mol% catalytic loading), 1-hexene was added (1.05 mmol, 0.13 mL). The reaction was stirred for 30 min at room temperature. Quenching with an excess of methanol turned the orange solution clear. The solvents were taken off *in vacuo* and the product (white solid) was washed with MeOH. Yield 105.2 mg.  $^1\text{H}$  NMR (500 MHz, 25 °C, d-chloroform):  $\delta$  1.18–1.36 (mult, bd, H(1) & H(3)–H(5)), 0.91 (mult, bd, H2), 0.81–0.90 (mult, bd, H6) ppm.  $^{13}\text{C}$  NMR (126 MHz, 25 °C, d-chloroform):  $\delta$  37.6 (C(1)), 34.2 (C(3)), 30.41 (C(2)), 29.9 (C(4)), 22.8 (C(5)), 13.9 (C(6)) ppm. GPC:  $M_n = 4641 \text{ g mol}^{-1}$ ,  $M_w = 4899 \text{ g mol}^{-1}$ ,  $D = 1.1$ . IR ( $\text{cm}^{-1}$ ): 2957, 2954, 2854, 1644, 1513, 1456, 1375, 1276, 1081, 974, 755, 661.

*Polymerisation of 1-hexene using dimer 1f (cation 2f):* To a solution of dimer **1f** (52.36 mg, 0.105 mmol) and  $[\text{Ph}_3\text{C}][\text{B}(\text{C}_6\text{F}_5)_4]$  (96.85 mg, 0.105 mmol) in toluene (3 mL) (10 mol%

catalytic loading), 1-hexene was added (1.05 mmol, 0.13 mL). The reaction was stirred for 30 min at room temperature. Quenching with an excess of methanol turned the orange solution clear. The solvents were taken off *in vacuo* and the product (white solid) was washed with MeOH. Yield 286.4 mg.  $^1\text{H}$  NMR (500 MHz, 25 °C, d-chloroform):  $\delta$  1.36–1.48 (mult, bd, H(1) & H(3)–H(5)), 1.04 (mult, bd, H2), 0.92–1.03 (mult, bd, H6).  $^{13}\text{C}$  NMR (126 MHz, 25 °C, d-chloroform):  $\delta$  39.9 (C(1)), 34.5 (C(3)), 30.1 (C(2)), 29.8 (C(4)), 22.9 (C(5)), 14.1 (C(6)). GPC:  $M_n = 4518 \text{ g mol}^{-1}$ ,  $M_w = 4761 \text{ g mol}^{-1}$ ,  $D = 1.1$ . IR ( $\text{cm}^{-1}$ ): 2957, 2954, 2859, 1644, 1513, 1456, 1374, 1272, 1081, 973, 755, 661.

*Polymerisation of cyclohexene using dimer 1a (cation 2a)*: To a solution of dimer **1a** (28.38 mg, 0.105 mmol) and  $[\text{Ph}_3\text{C}][\text{B}(\text{C}_6\text{F}_5)_4]$  (96.85 mg, 0.105 mmol) in toluene (3 mL) (10 mol% catalytic loading), cyclohexene was added (1.05 mmol, 0.11 mL). The reaction was stirred for 24 h at 80 °C. Quenching with an excess of methanol turned the brown solution clear. The solvents were taken off *in vacuo* and the product (brownish-white solid) was washed with MeOH. Yield 147.6 mg.  $^1\text{H}$  NMR (500 MHz, 25 °C, d-chloroform):  $\delta$  1.41–2.53 (mult,  $\text{CH}_2$  groups in cyclohexane) ppm.  $^{13}\text{C}$  NMR (126 MHz, 25 °C, d-chloroform):  $\delta$  19.0, 19.4, 19.5, 21.0, 21.5, 21.6, 26.3 (4 signals), 26.4, 26.5, 27.0, 27.1, 27.3 (3 signals), 30.6, 33.7, 33.8, 33.9, 34.6, 34.6, 34.7, 34.7 ppm. GPC:  $M_n = 4883 \text{ g mol}^{-1}$ ,  $M_w = 5078 \text{ g mol}^{-1}$ ,  $D = 1.0$ . IR ( $\text{cm}^{-1}$ ): 2924, 2850, 1643, 1460, 907, 896.

*Polymerisation of cyclohexene using dimer 1f (cation 2f)*: To a solution of dimer **1f** (52.36 mg, 0.105 mmol) and  $[\text{Ph}_3\text{C}][\text{B}(\text{C}_6\text{F}_5)_4]$  (96.85 mg, 0.105 mmol) in toluene (3 mL) (10 mol% catalytic loading), cyclohexene was added (1.05 mmol, 0.11 mL). The reaction was stirred for 24 h at 80 °C. Quenching with an excess of methanol turned the brown solution clear. The solvents were taken off *in vacuo* and the product (brownish-white solid) was washed with MeOH. Yield 263.3 mg.  $^1\text{H}$  NMR (500 MHz, 25 °C, d-chloroform):  $\delta$  1.40–2.50 (mult,  $\text{CH}_2$  groups in cyclohexane) ppm.  $^{13}\text{C}$  NMR (126 MHz, 25 °C, d-chloroform):  $\delta$  18.9, 19.3, 19.4, 21.0, 21.5, 21.5, 26.2, 26.2, 26.3, 26.4, 26.4, 27.0, 27.1, 27.2, 27.3, 27.4, 31.4, 33.7, 33.8, 33.8, 34.6, 34.6, 34.6, 34.7 ppm. GPC:  $M_n = 5100 \text{ g mol}^{-1}$ ,  $M_w = 5380 \text{ g mol}^{-1}$ ,  $D = 1.0$ . IR ( $\text{cm}^{-1}$ ): 2923, 2850, 1644, 1458, 906, 890.

## Additional NMR spectra

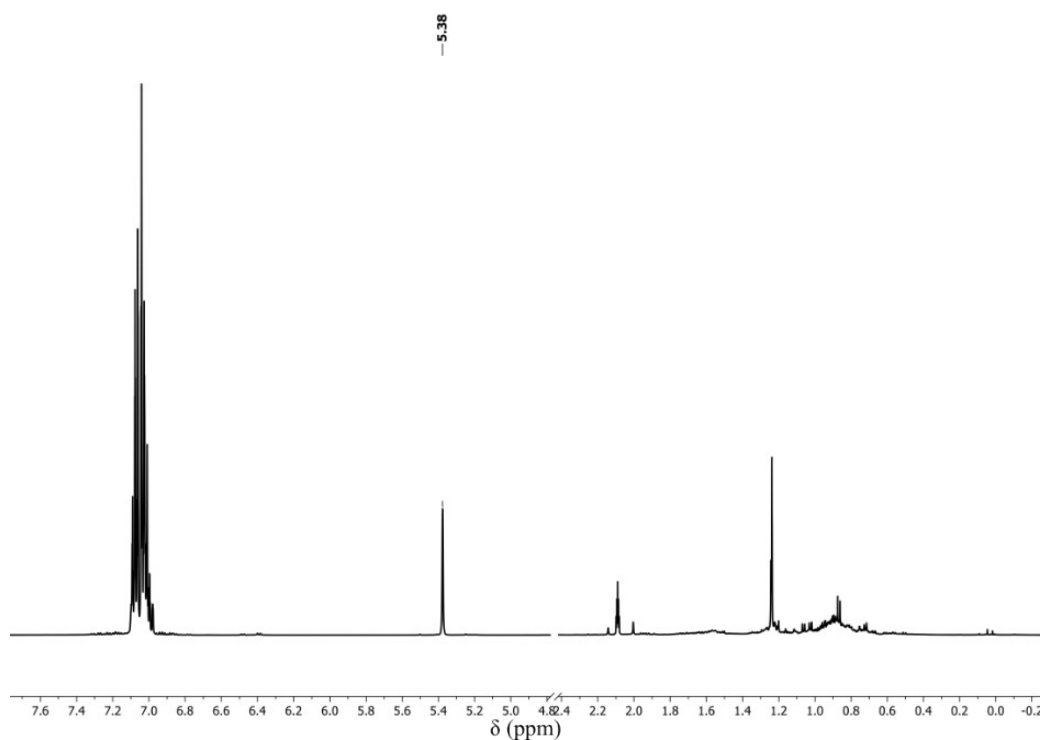

**Figure S3.** <sup>1</sup>H NMR (25 °C, d<sub>8</sub>-toluene, 500.1 MHz) spectrum of the reaction of **1e** with [Ph<sub>3</sub>C][B(C<sub>6</sub>F<sub>5</sub>)<sub>4</sub>] (1:1). The extraction of the <sup>t</sup>Bu group is expected to result in the formation Ph<sub>3</sub>CH and release of isobutene. The peak at δ 5.38 ppm represents Ph<sub>3</sub>CH.

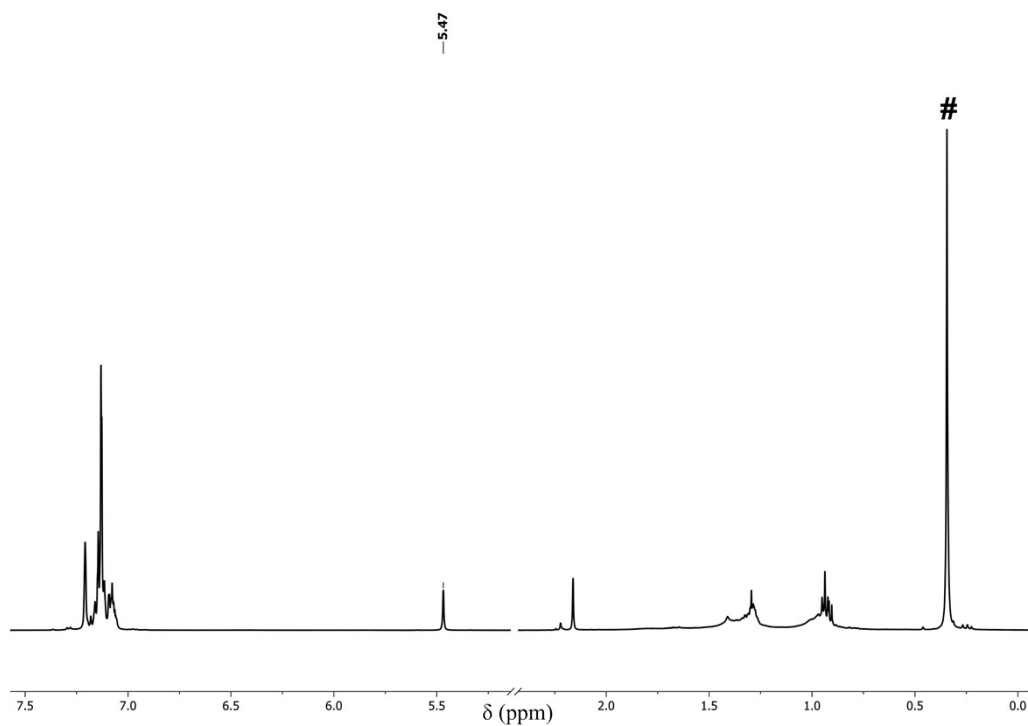

**Figure S4.** <sup>1</sup>H NMR (25 °C, d<sub>6</sub>-benzene, 500.1 MHz) spectrum of the reaction of **1f** with [Ph<sub>3</sub>C][B(C<sub>6</sub>F<sub>5</sub>)<sub>4</sub>] (1:1). The extraction of the <sup>t</sup>Bu group is expected to result in the formation Ph<sub>3</sub>CH and release of isobutene. The peak at δ 5.47 ppm represents Ph<sub>3</sub>CH. # vacuum grease.

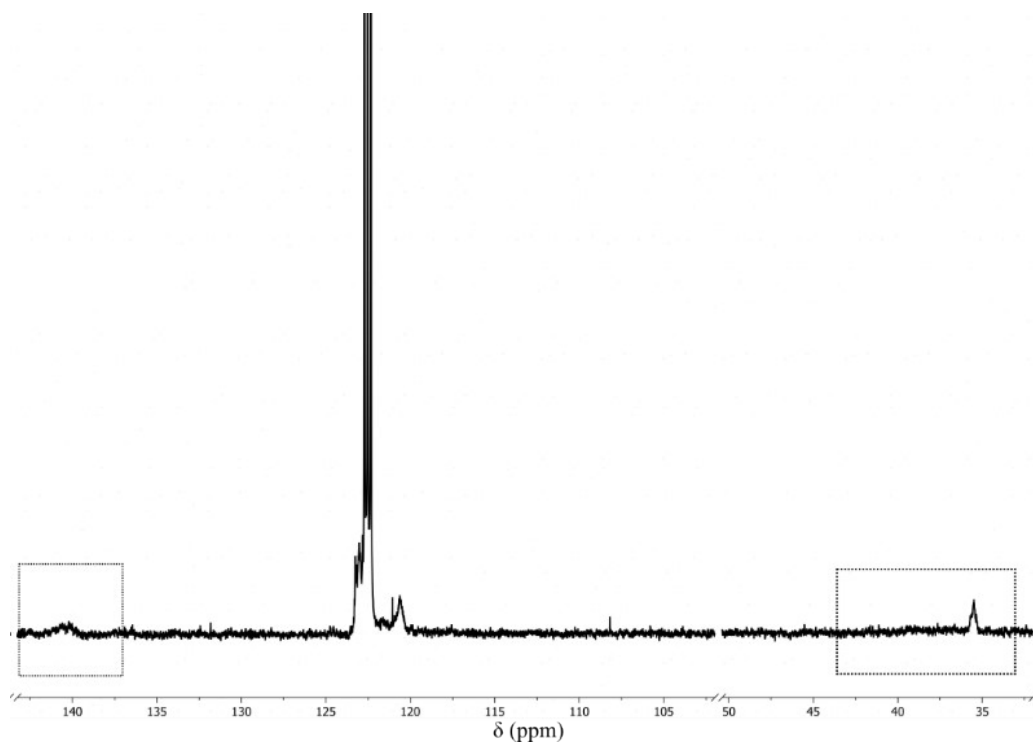

**Figure S5.**  $^{13}\text{C}$  NMR (25  $^{\circ}\text{C}$ ,  $\text{d}_8$ -toluene, 126 MHz) spectrum of atactic polystyrene prepared using a 10 mol% loading of only  $[\text{Ph}_3\text{C}][\text{B}(\text{C}_6\text{F}_5)_4]$  at room temperature (control experiment without any aluminium pyridyl precatalyst).

## IR spectra

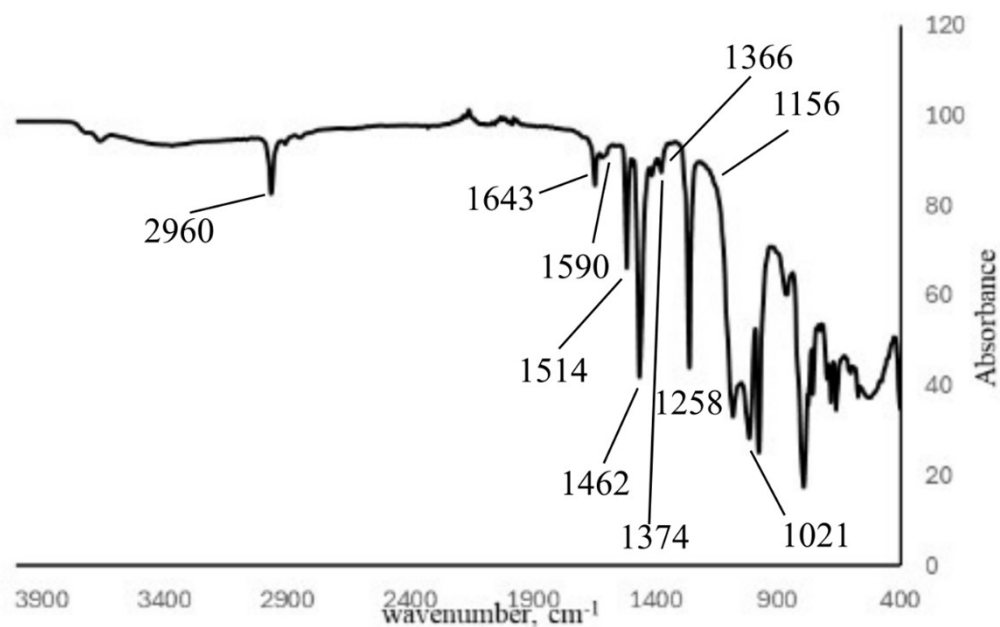

**Figure S6.** IR spectrum of the trimerisation product of *t*-butylacetylene (1,3,6-tri-*t*-butylfulvene) prepared using a 10 mol% catalytic loading of precatalyst **1f** and [Ph<sub>3</sub>C][B(C<sub>6</sub>F<sub>5</sub>)<sub>4</sub>] (cation **2f**).

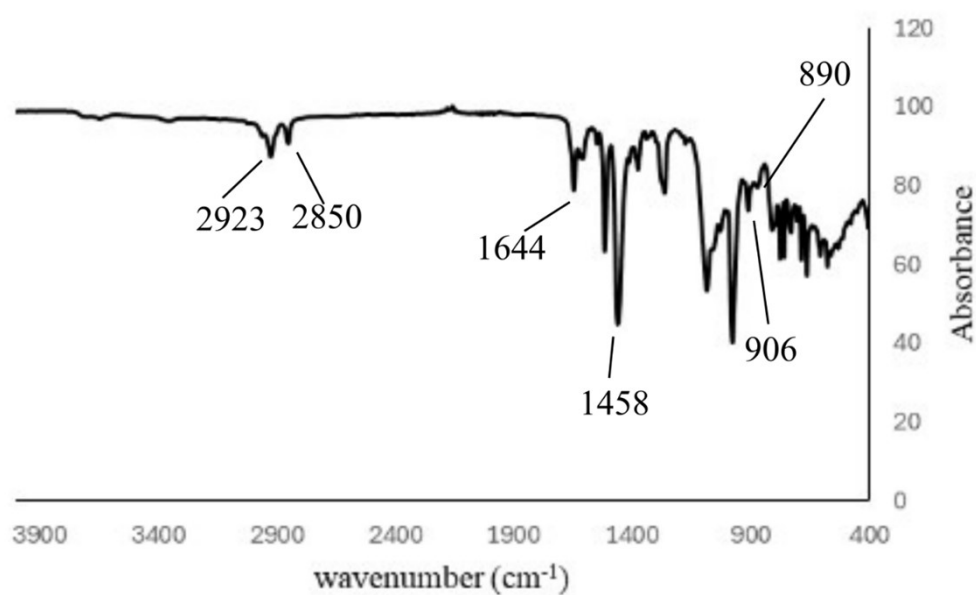

**Figure S7.** IR spectrum of the cyclohexene polymerisation product prepared using a 10 mol% catalytic loading of precatalyst **1f** and [Ph<sub>3</sub>C][B(C<sub>6</sub>F<sub>5</sub>)<sub>4</sub>] (cation **2f**).

## SEC traces

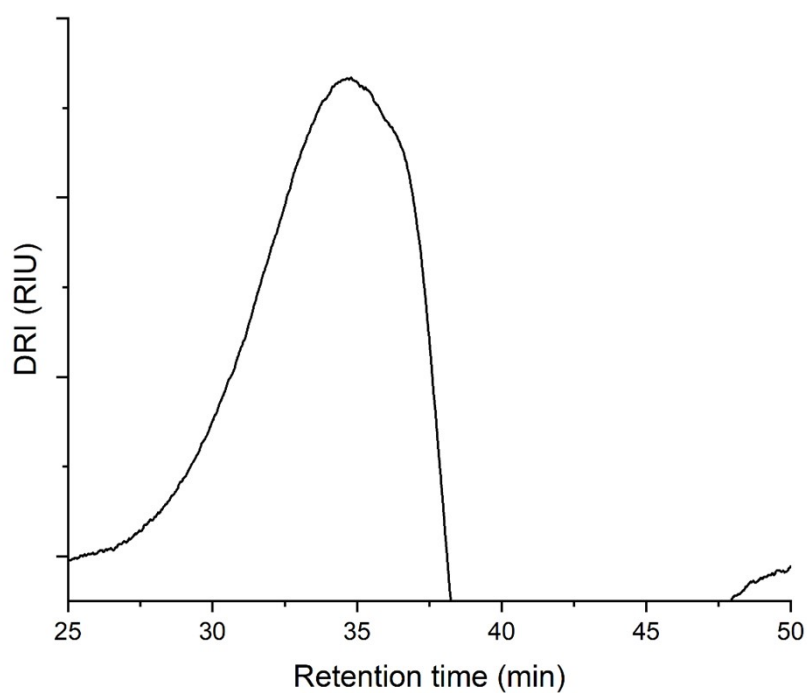

**Figure S8.** GPC trace of styrene polymerisation product using a 0.5 mol% catalytic loading of cation **2a** at room temperature. The peak at ~36 min is a known solvent peak.

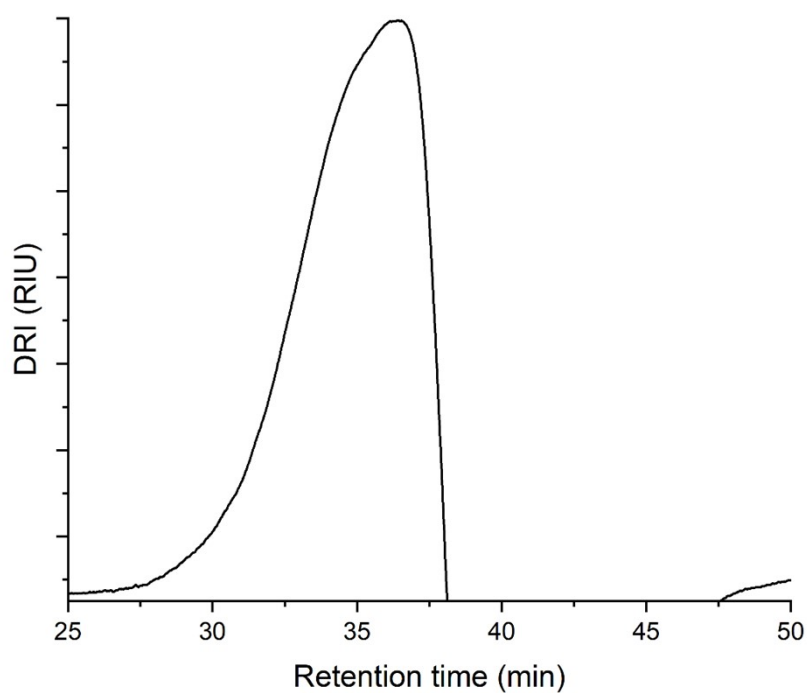

**Figure S9.** GPC trace of styrene polymerisation product using a 2.5 mol% catalytic loading of cation **2a** at room temperature. The peak at ~36 min is a known solvent peak.

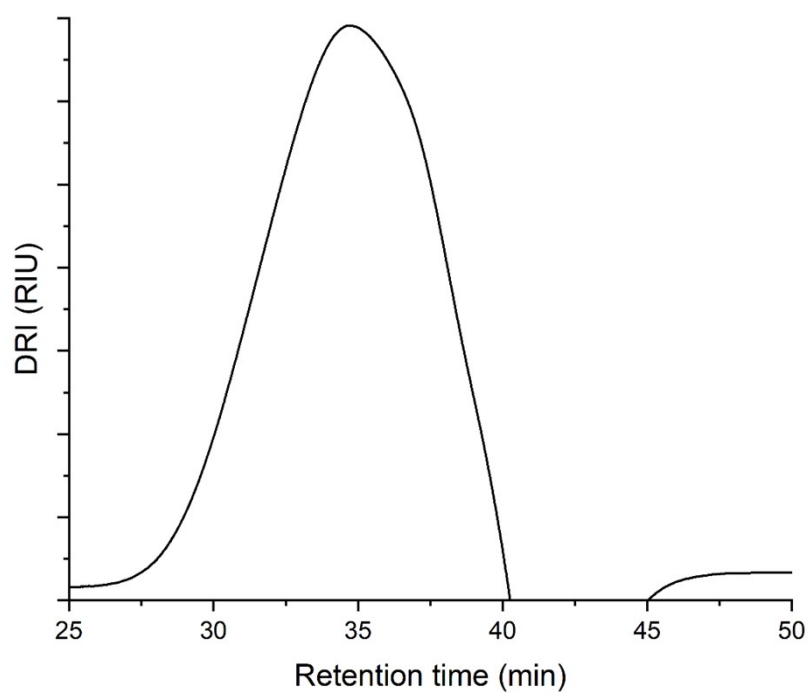

**Figure S10.** GPC trace of styrene polymerisation product using a 0.5 mol% catalytic loading of cation **2a** at  $-15^{\circ}\text{C}$ . The peak at  $\sim 36$  min is a known solvent peak.

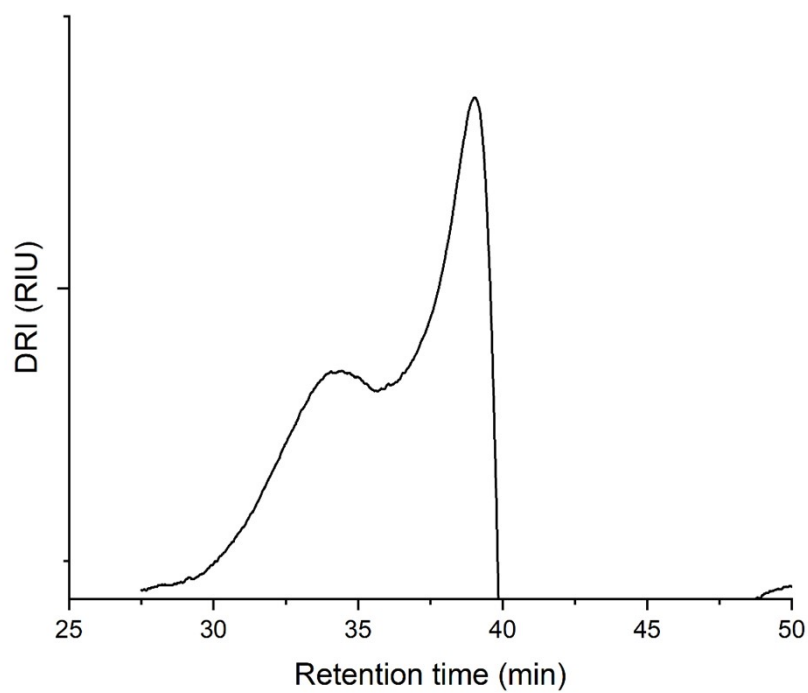

**Figure S11.** GPC trace of styrene polymerisation product using a 2.5 mol% catalytic loading of cation **2a** at  $-15^{\circ}\text{C}$ . The peak at  $\sim 36$  min is a known solvent peak.



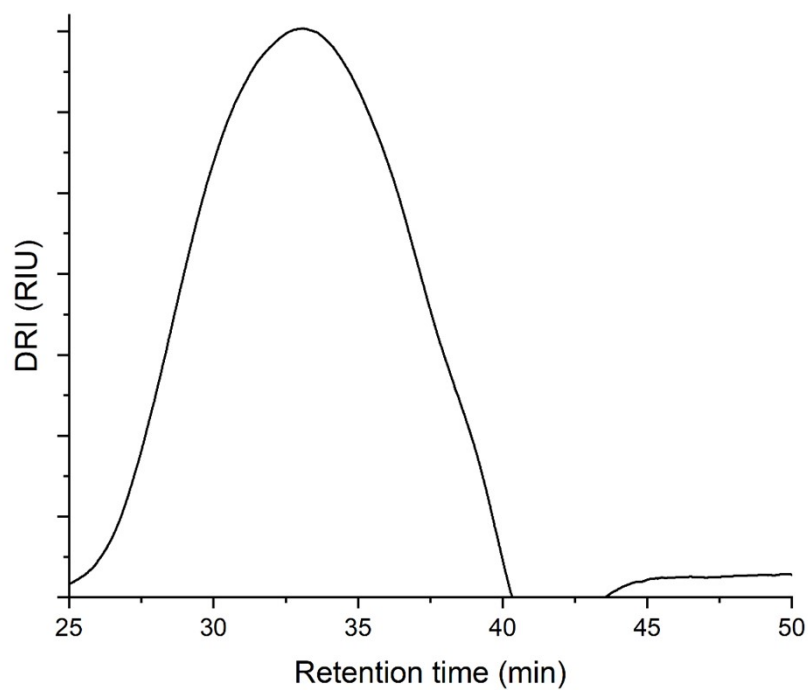

**Figure S12.** GPC trace of styrene polymerisation product using a 0.5 mol% catalytic loading of cation **2b** at 0 °C. The peak at ~36 min is a known solvent peak.

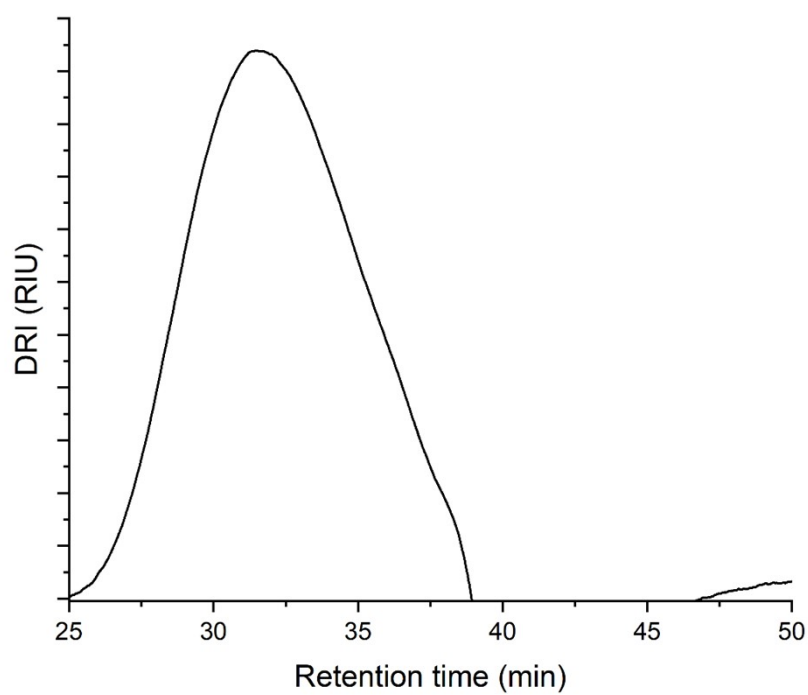

**Figure S13.** GPC trace of styrene polymerisation product using a 0.5 mol% catalytic loading of cation **2c** at 0 °C. The peak at ~36 min is a known solvent peak.

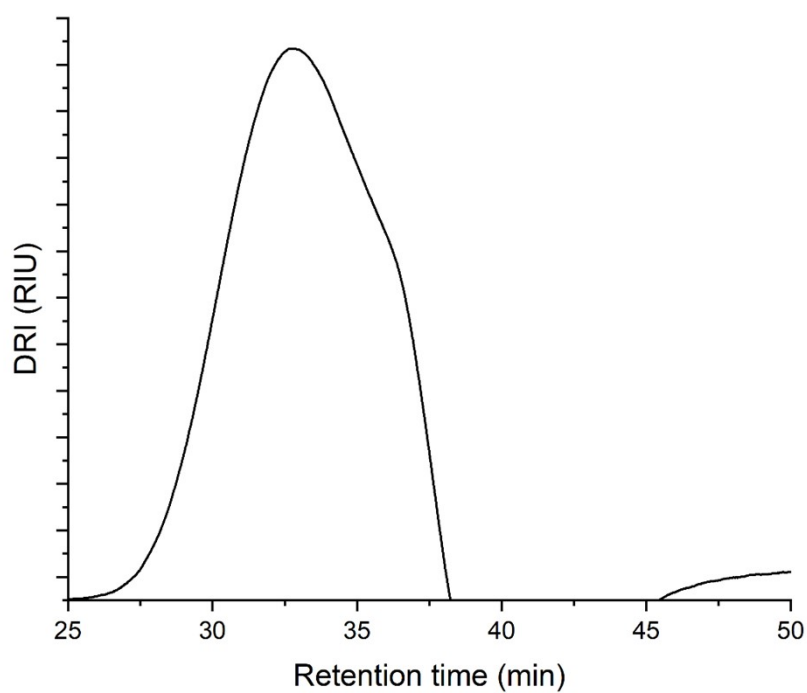

**Figure S14.** GPC trace of styrene polymerisation product using a 0.5 mol% catalytic loading of cation **2e** at  $-15^{\circ}\text{C}$ . The peak at  $\sim 36$  min is a known solvent peak.

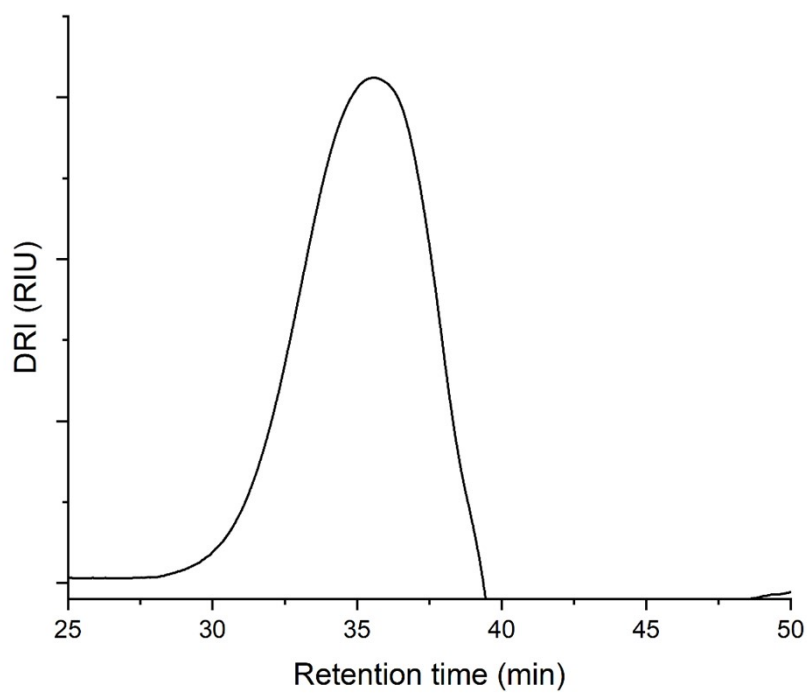

**Figure S15.** GPC trace of styrene polymerisation product using a 2.5 mol% catalytic loading of cation **2e** at  $-15^{\circ}\text{C}$ . The peak at  $\sim 36$  min is a known solvent peak.

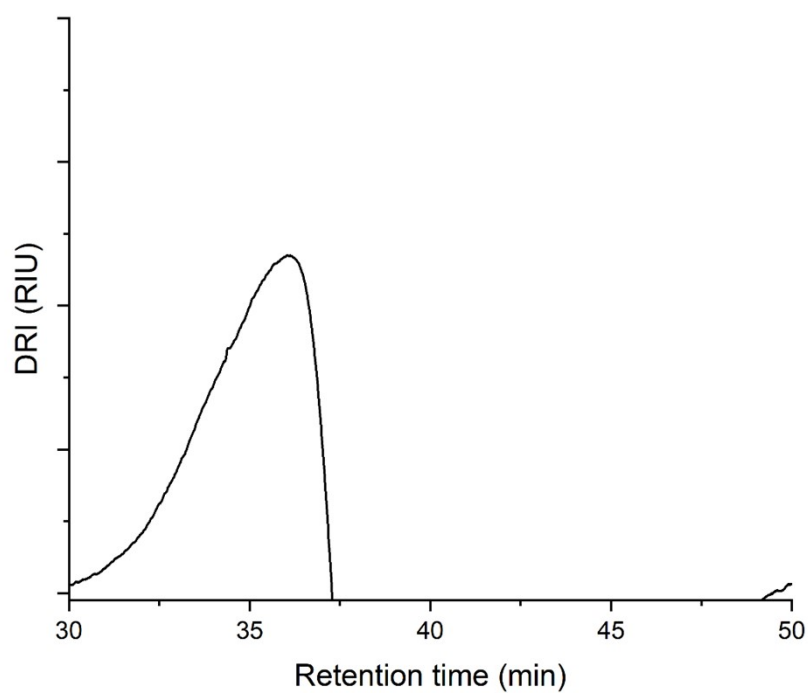

**Figure S16.** GPC trace of styrene polymerisation product using a 5 mol% catalytic loading of cation **2e** at  $-15^{\circ}\text{C}$ . The peak at  $\sim 36$  min is a known solvent peak.

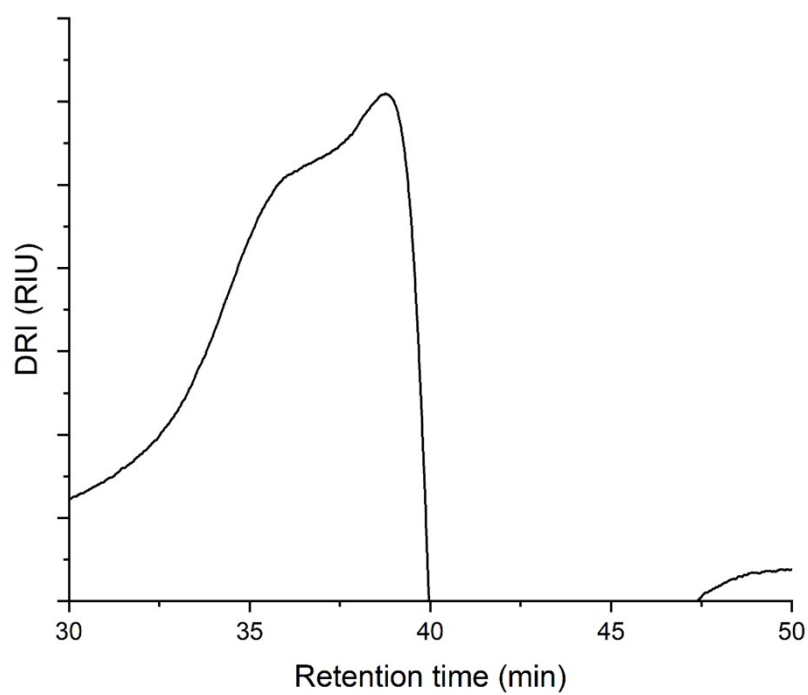

**Figure S17.** GPC trace of styrene polymerisation product using a 10 mol% catalytic loading of cation **2e** at  $-15^{\circ}\text{C}$ . The peak at  $\sim 36$  min is a known solvent peak.

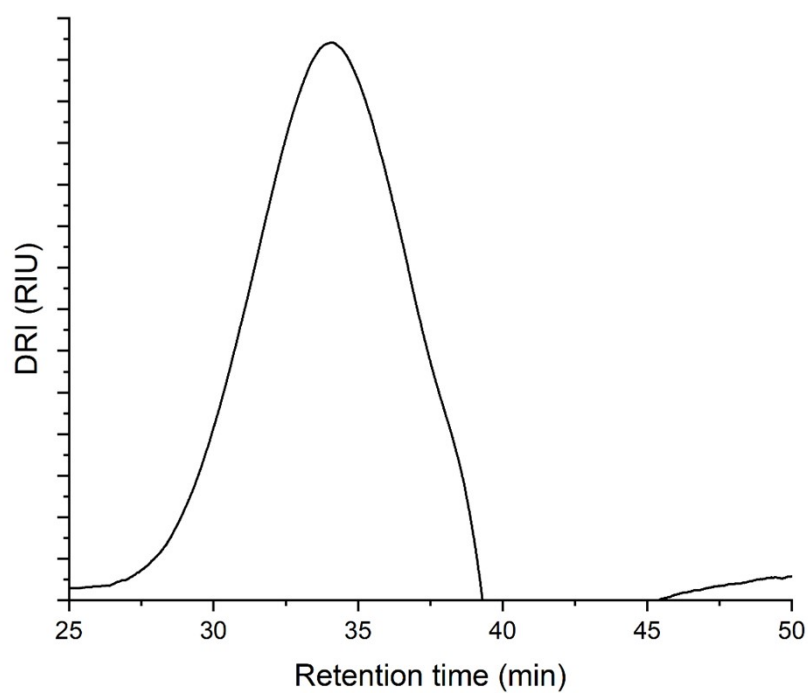

**Figure S18.** GPC trace of styrene polymerisation product using a 0.5 mol% catalytic loading of cation **2f** at 0 °C. The peak at ~36 min is a known solvent peak.

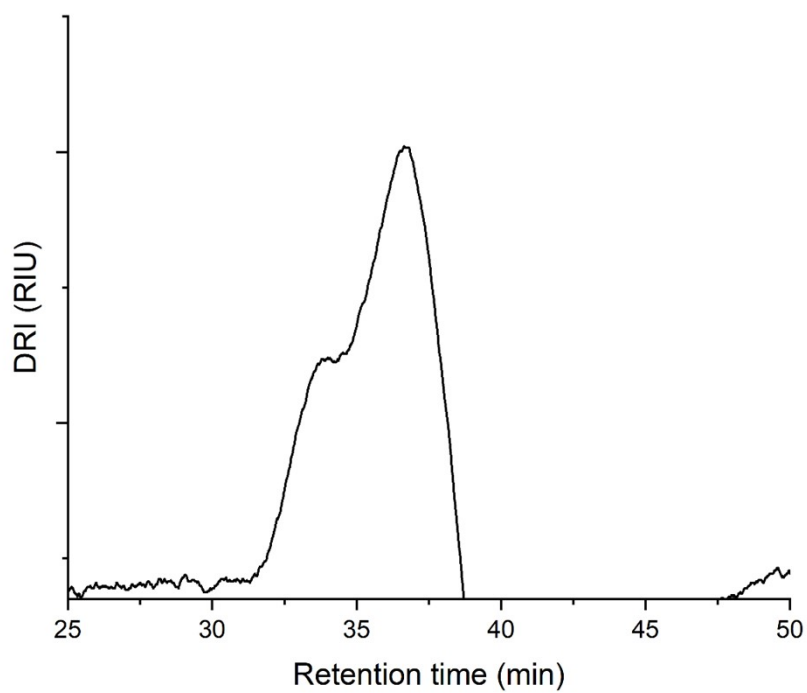

**Figure S19.** GPC trace of 1-hexene polymerisation product using a 10 mol% catalytic loading of cation **2a**. The peak at ~36 min is a known solvent peak.

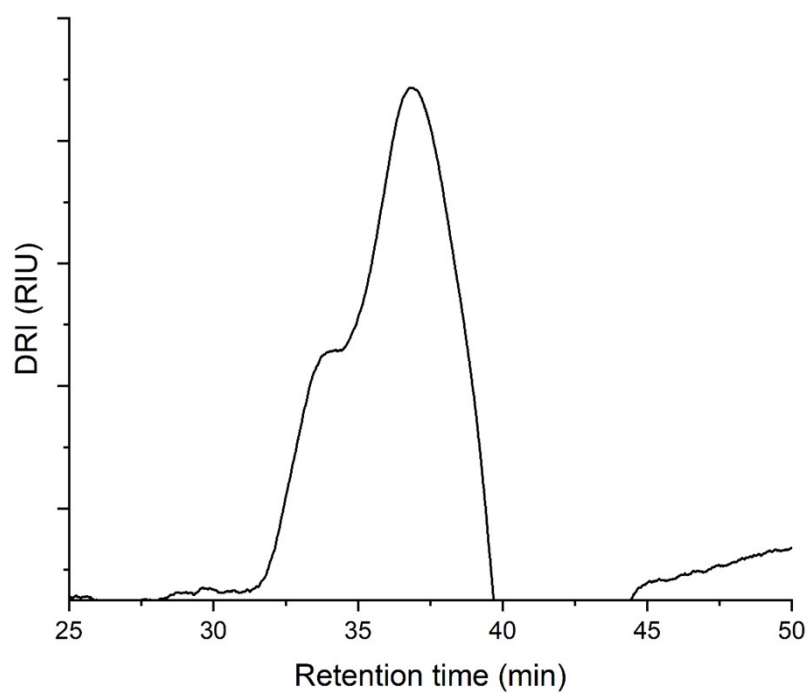

**Figure S20.** GPC trace of 1-hexene polymerisation product using a 10 mol% catalytic loading of cation **2f**. The peak at ~36 min is a known solvent peak.

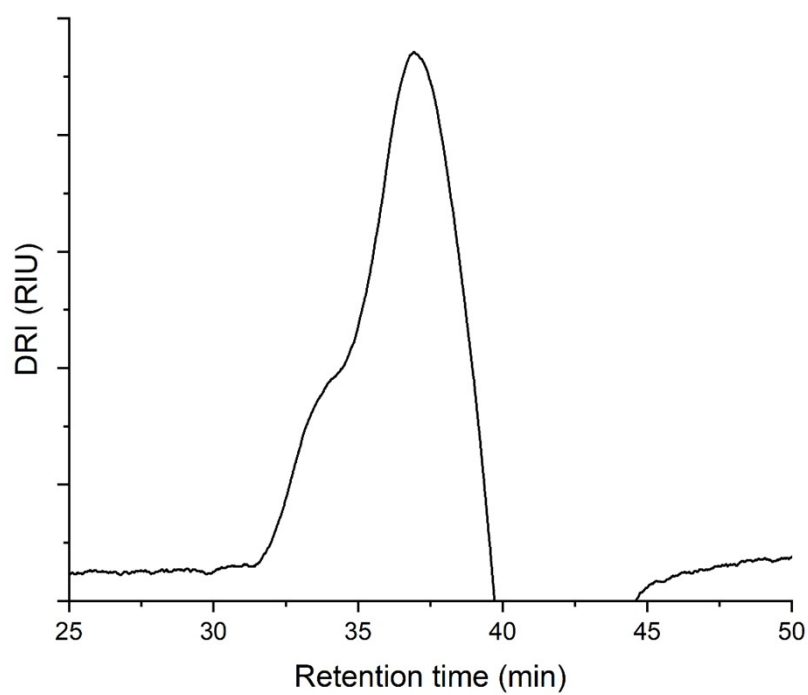

**Figure S21.** GPC trace of cyclohexene polymerisation product using a 10 mol% catalytic loading of cation **2a**. The peak at ~36 min is a known solvent peak.

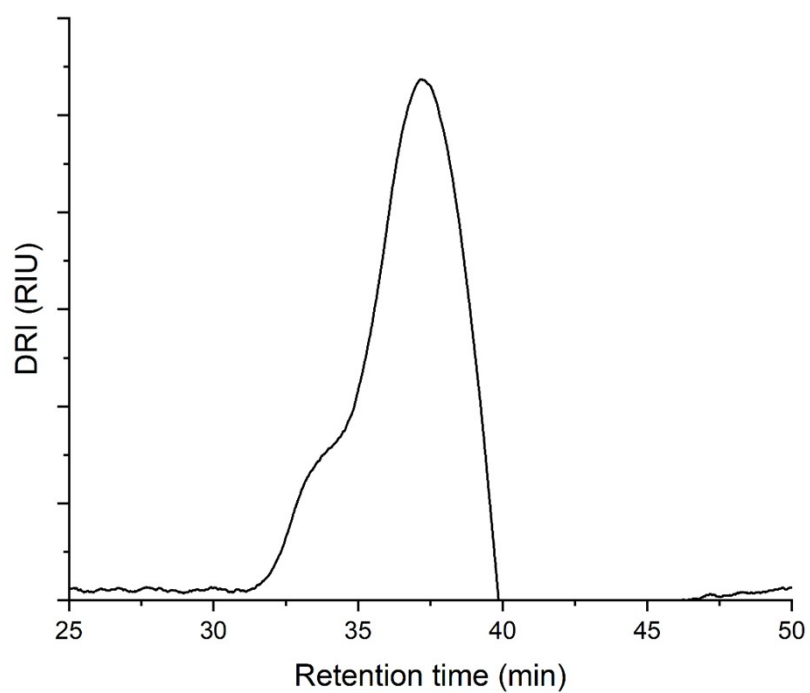

**Figure S22.** GPC trace of cyclohexene polymerisation product using a 10 mol% catalytic loading of cation **2f**. The peak at ~36 min is a known solvent peak.

## DSC thermal analysis

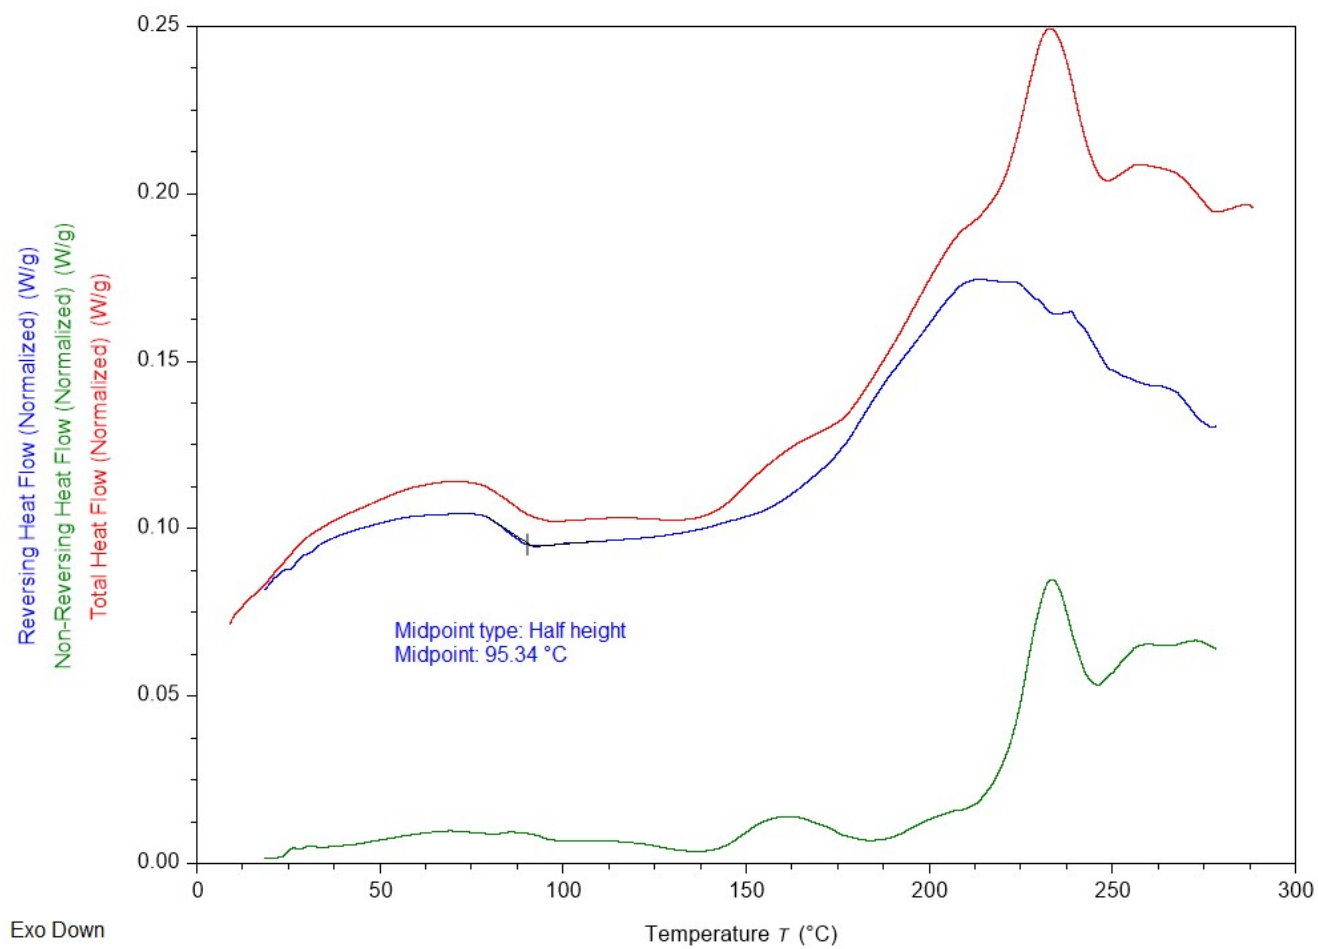

**Figure S23.** DSC curve of (atactic) styrene polymerisation product using a 0.5 mol% catalytic loading of cation **2b** at 0 °C.  $T_g$  = 95.34 °C.

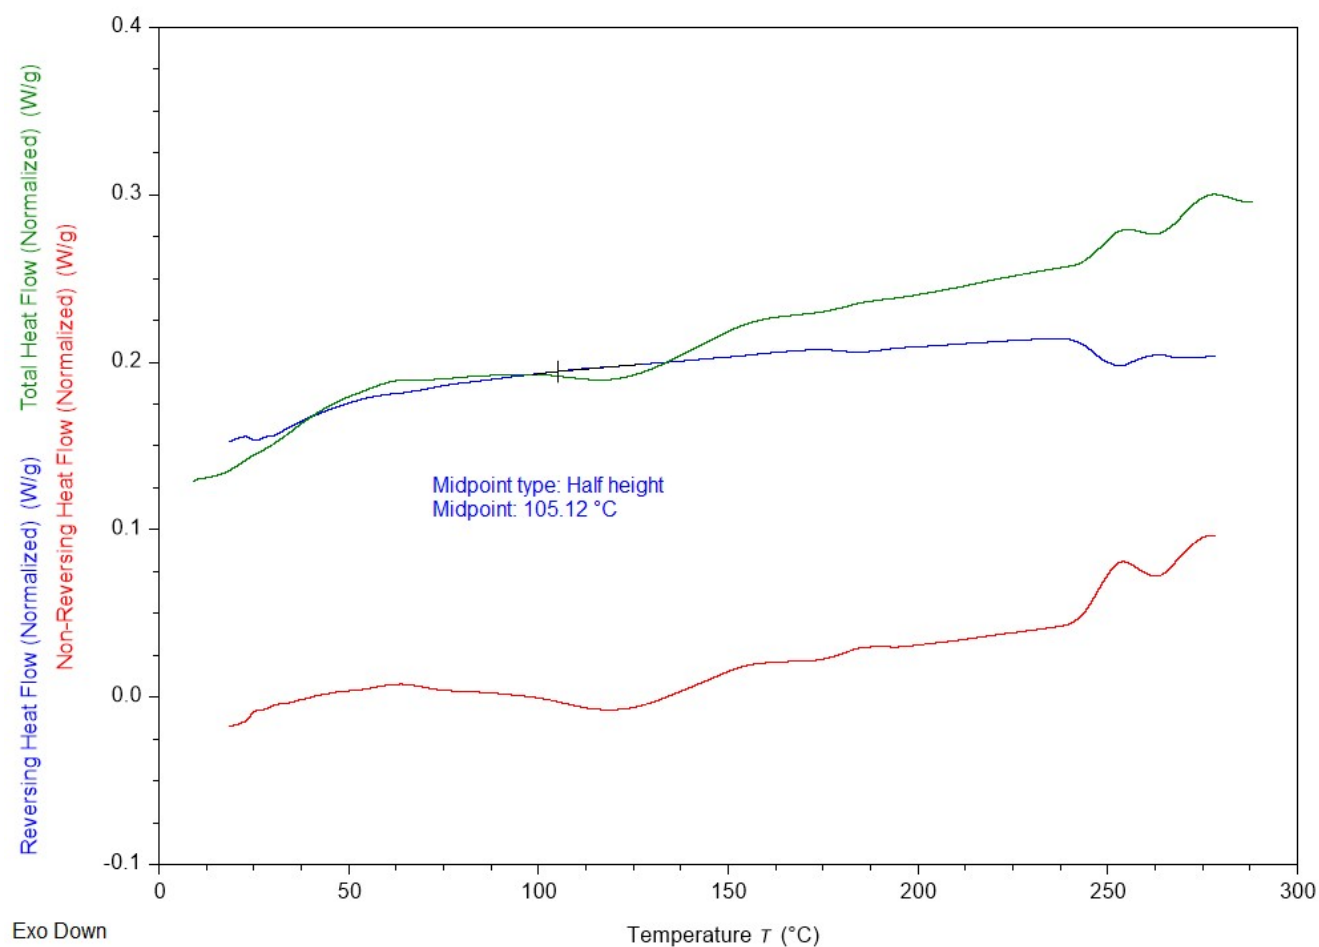

**Figure S24.** DSC curve of (atactic+syndiotactic) styrene polymerisation product using a 0.5 mol% catalytic loading of cation **2f** at 0 °C.  $T_g = 105.12$  °C.



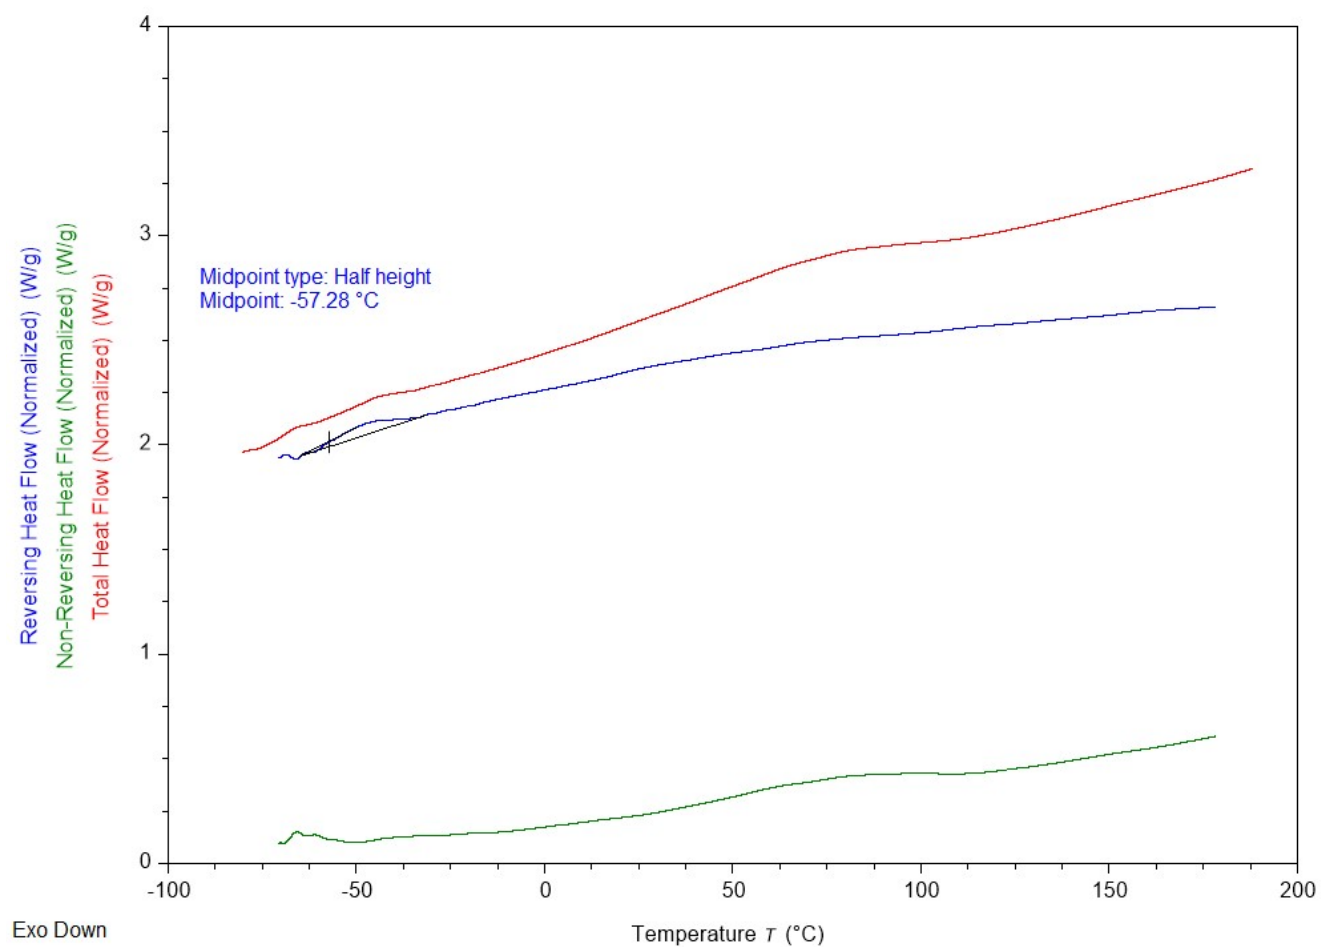

**Figure S25.** DSC curve of 1-hexene polymerisation product using a 10 mol% catalytic loading of cation **2a**.  $T_g = -57.28^{\circ}\text{C}$ .

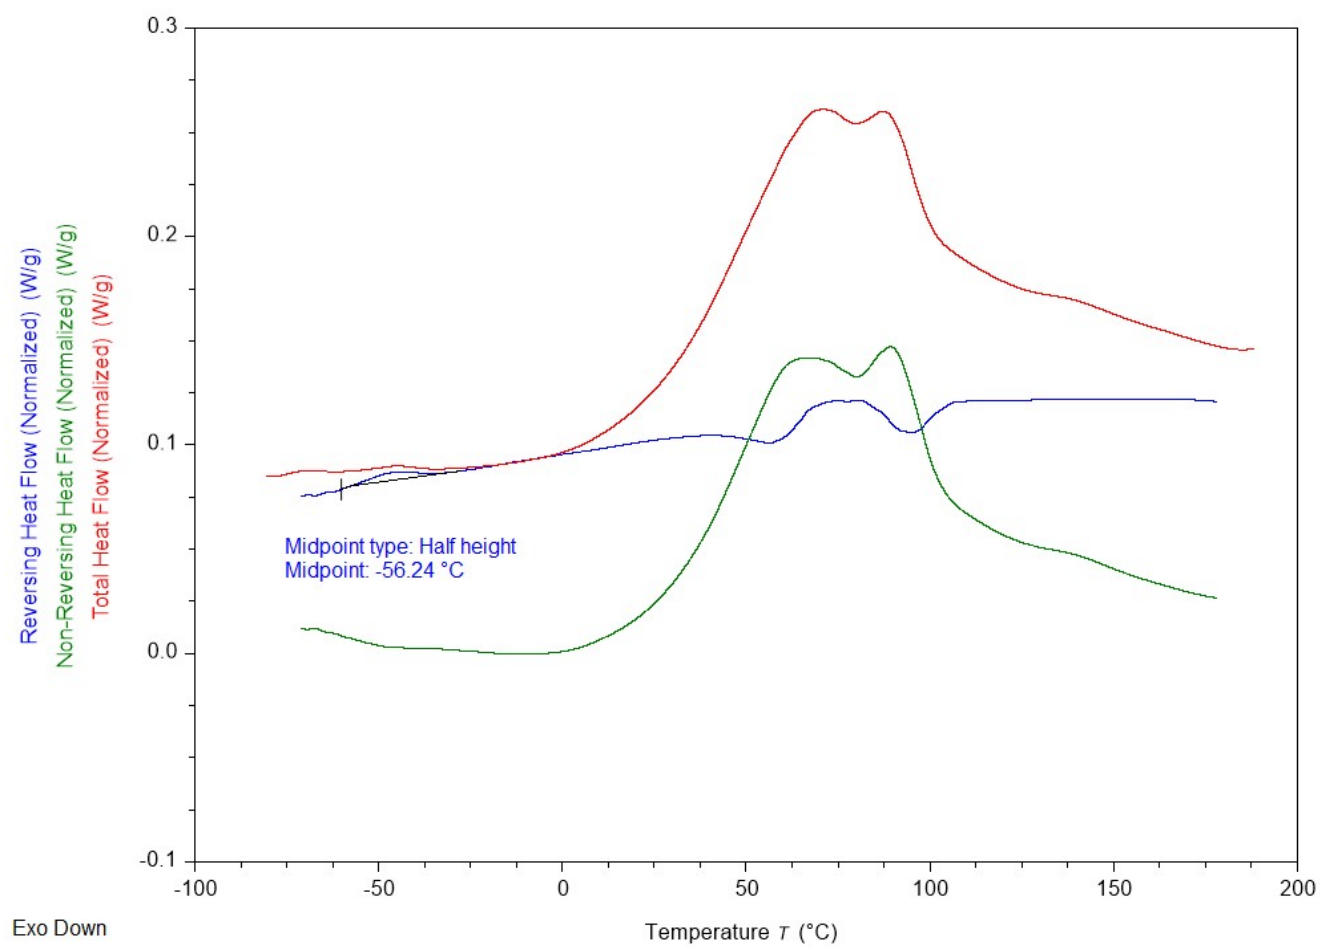

**Figure S26.** DSC curve of 1-hexene polymerisation product using a 10 mol% catalytic loading of cation **2f**.  $T_g = -56.24$  °C.

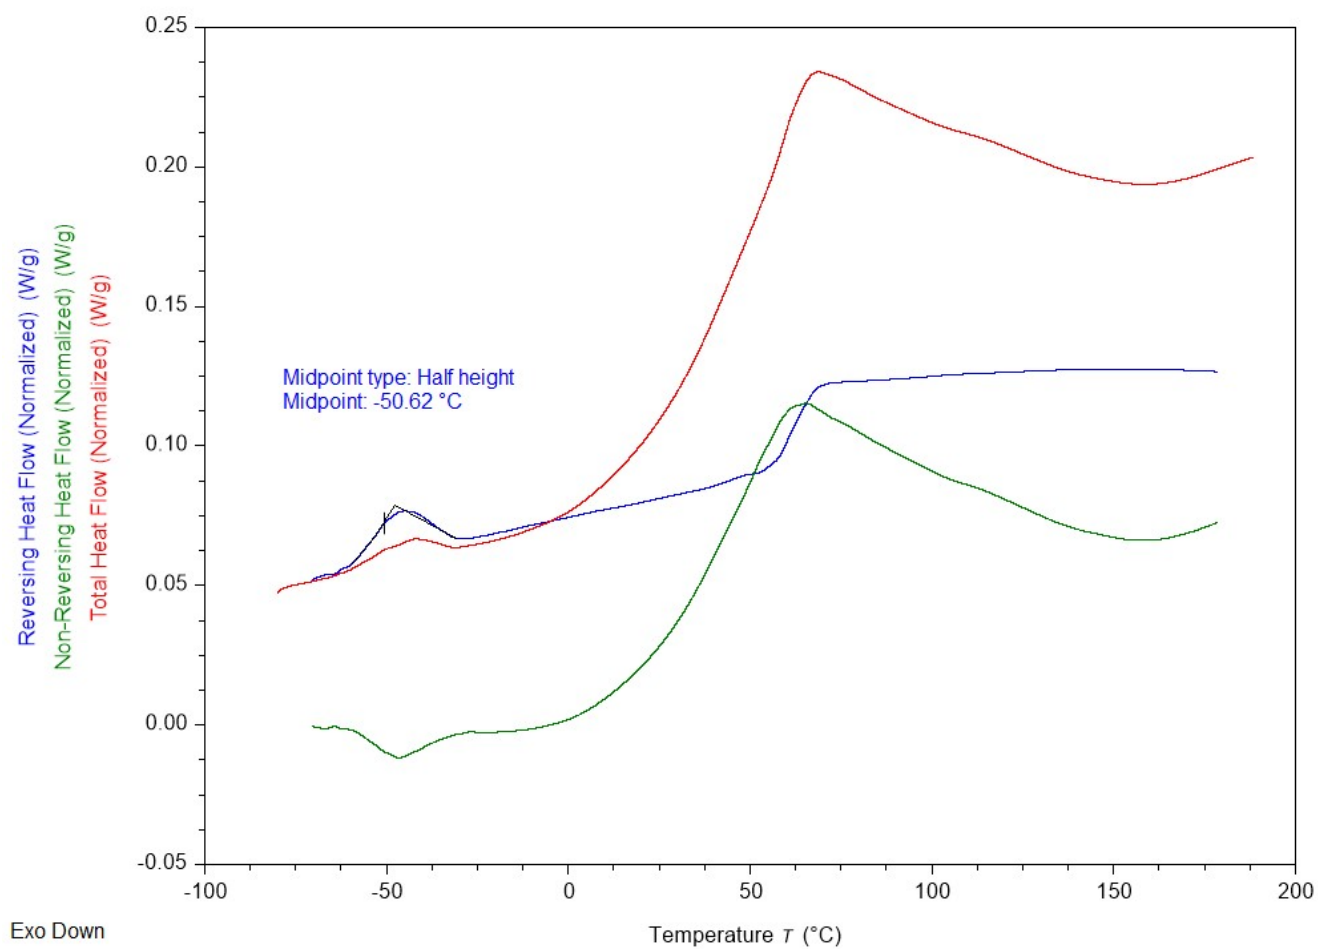

**Figure S27.** DSC curve of cyclohexene polymerisation product using a 10 mol% catalytic loading of cation **2a**.  $T_g = -50.62$  °C.

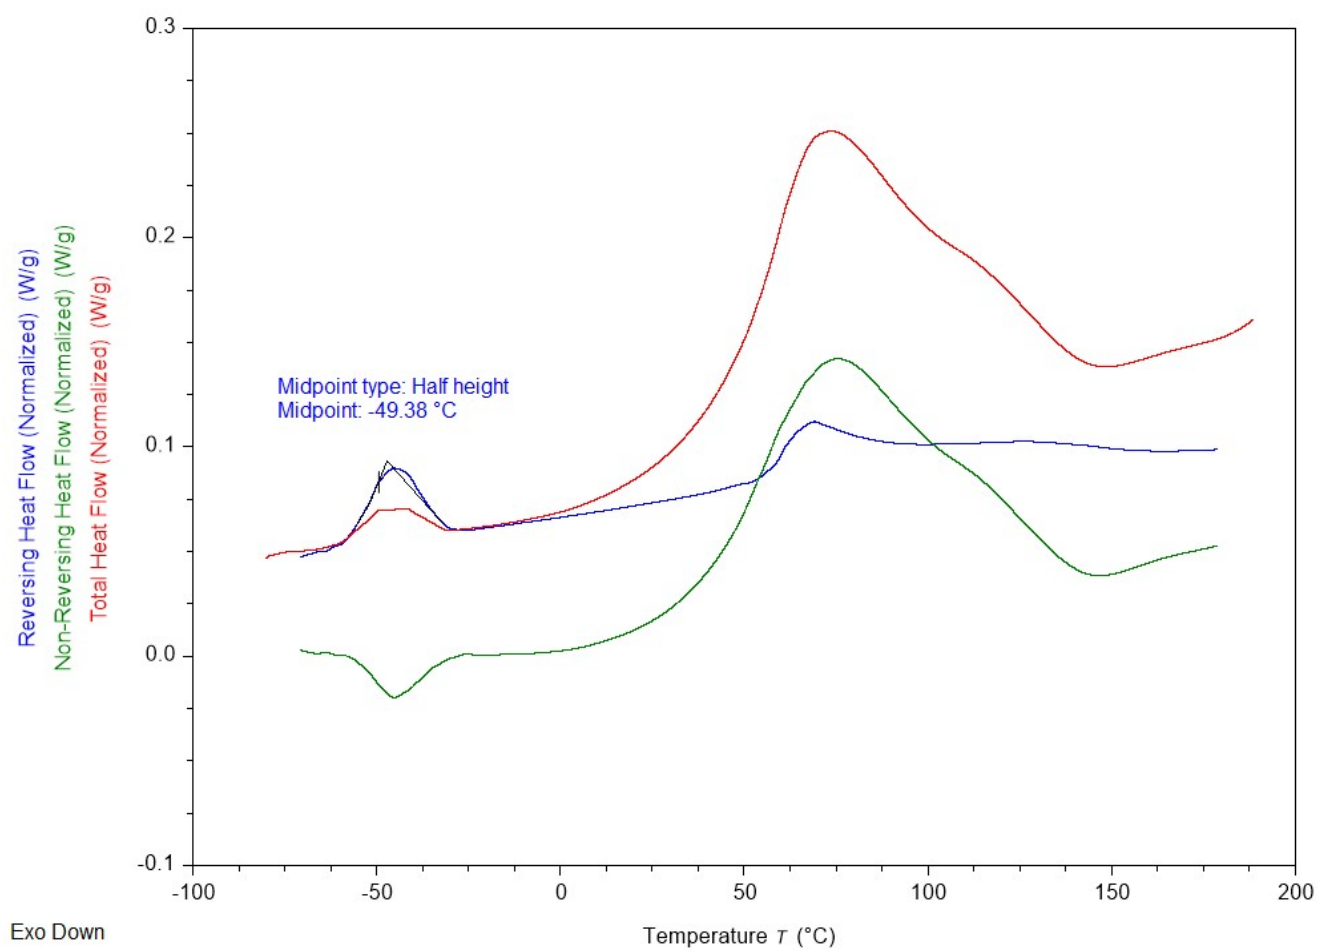

**Figure S28.** DSC curve of cyclohexene polymerisation product using a 10 mol% catalytic loading of cation **2f**.  $T_g = -49.28$  °C.

## Computational methods

### *Mechanistic studies*

Density Functional Theory (DFT) calculations were carried out using Gaussian 16 (Revision B.01).<sup>2</sup> Structural optimisations were performed at the B3LYP-D3/6-31G(d) level of theory.<sup>3–6</sup> Frequency analyses were conducted to validate the optimised structures, ensuring they corresponded to either energy minima or first-order saddle points on the potential surface. Single-point energy values of optimised structures were computed at the  $\omega$ B97X-D/6-311++G(d,p)<sup>7</sup> level of theory. In order to make the structure compatible with the forcefield parameterisation, Al was replaced with Si to produce a pseudo structure for conformational searching. Conformational searches were conducted in MacroModel (v11.7) with Maestro (release 2024-03)<sup>8</sup> using the OPLS4 force field with the mixed torsional / low-mode sampling method. A setting of 1000 as the maximum number of steps and the maximum number of steps per rotatable bond was used. Conformers within an energy window of 5.0 kcal mol<sup>-1</sup> were saved for further analyses. CYLView 2 was used to generate images of structures.<sup>9</sup>

### *Molecular surface analyses*

DFT calculations were carried out using Orca v. 6.0.1.<sup>10</sup> Single-point energy values of structures optimised as above were computed at the  $\omega$ B97X-D3(BJ)/def2-TZVP level of theory (with the auxiliary basis set def2/J).<sup>11–13</sup> Molecular electrostatic potentials (ESP) were calculated using the `orca_vpot` functionality of Orca 6.0.1, whereas average local ionisation energy (ALIE) and local electron attachment energy (LEAE) calculations were carried out using Multiwfn v. 3.8;<sup>10,14,15</sup> in all cases, the properties were computed on the wavefunctions from the aforementioned single-point calculations ( $\omega$ B97X-D3(BJ)/def2-TZVP). All three properties were mapped on the surfaces of the  $\rho = 0.001$  a.u. isodensity envelopes and were plotted with ChimeraX v. 1.10.<sup>16</sup>

### *Topographic steric analyses*

Topographic steric maps were generated with SambVca v. 2.1, including H-atoms; the parameter values used for the generation of the isocontours and calculation of buried volumes were those recommended by the original authors of the program (Bondi radii scaled by 1.17, sphere radius  $R = 3.5$  Å, distance from Al centre  $d = 0.0$  Å; a slightly finer mesh spacing of  $s = 0.08$  Å was used over the default).

## Fluoride ion affinities (FIA)

|                                    | <b>G</b>    | <b>ΔG</b>  | <b>FIA</b>        |
|------------------------------------|-------------|------------|-------------------|
| CF <sub>2</sub> O                  | -313.03413  |            | 0 (by definition) |
| CF <sub>3</sub> O <sup>-</sup>     | -412.97138  | -99.937253 |                   |
| [Int1] <sup>+</sup>                | -1099.6194  |            | -0.193817         |
| Int1-F                             | -1199.7505  | -100.13107 |                   |
| Ph <sub>3</sub> C <sup>+</sup>     | -732.48536  |            | -0.163814         |
| Ph <sub>3</sub> CF                 | -832.58643  | -100.10107 |                   |
| AlCl <sub>3</sub>                  | -1623.28800 |            | -0.107878         |
| [AlCl <sub>3</sub> F] <sup>-</sup> | -1723.33320 | -100.04513 |                   |

Calculated at ωB97X-D/6-311++G(d,p)//B3LYP-D3/6-31G(d)

## Qualitative molecular surface analysis

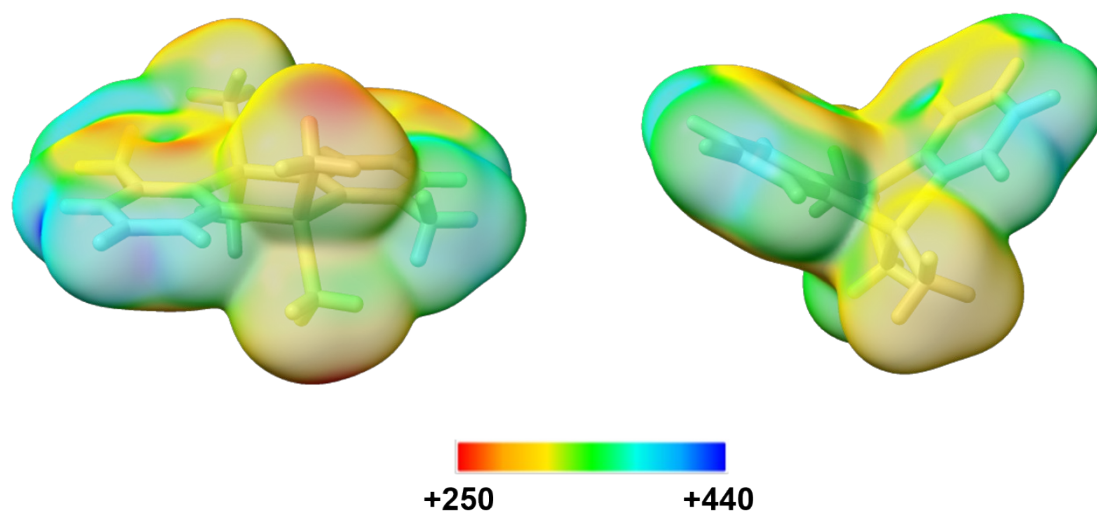

**Figure S29.** Average local ionisation energy (ALIE) maps for one of the neutral pre-catalysts (**1b**, right) and a catalytically active cationic complex (**2a**,  $[\text{MeAl}(\text{2-py})_2(\mu\text{-Me})\text{AlMe}]^+$  as per our calculations, left) mapped onto the 0.001 a.u. isodensity envelope; the ALIE scale is in  $\text{kcal mol}^{-1}$ . The global minimum value is located clearly on the terminal methyl of the pre-catalyst, indicating the high electrophilicity thereof.

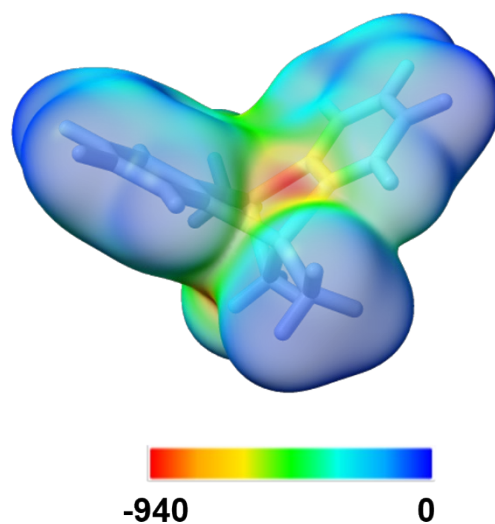

**Figure S30.** Local electron attachment energy (LEAE) map for a catalytically active cationic complex (**2a**,  $[\text{MeAl}(\text{2-py})_2(\mu\text{-Me})\text{AlMe}]^+$ ) mapped onto the 0.001 a.u. isodensity envelope; the LEAE scale is in  $\text{kcal mol}^{-1}$ . Note that a corresponding calculation is not possible for the neutral pre-catalysts, as in their case all unoccupied orbitals have positive energies. The LEAE maximum value, highly concentrated on the locus of the Al  $\sigma$ -hole, demonstrates the high nucleophilicity thereof.

## Stereochemistry of chain transfer

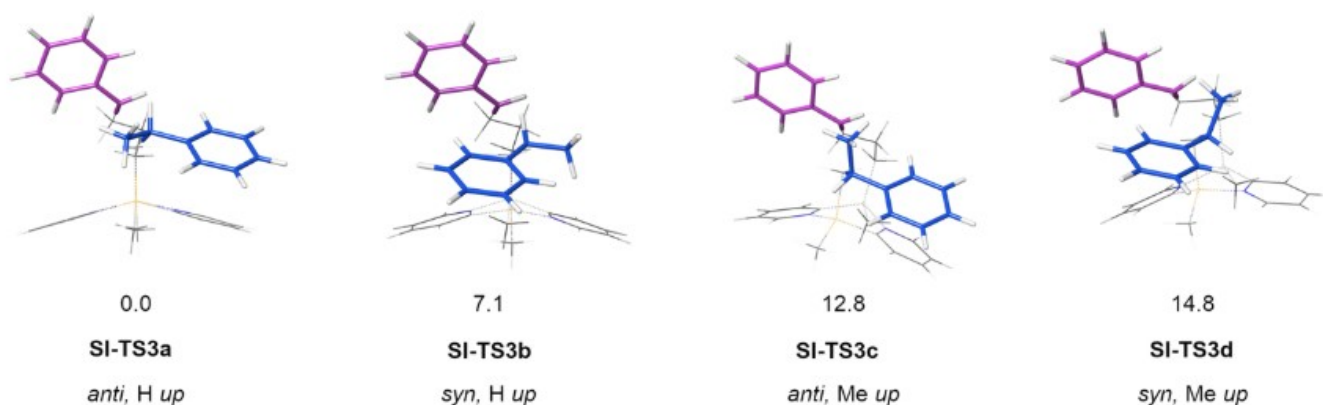

**Figure S31.** Isomeric transition states illustrating effect of conformation on **TS3** energy, energies are relative electronic energies in  $\text{kJ mol}^{-1}$ .

Energies calculated at B3LYP-6-31G(d) level

Structures **SI-TS3c** and **SI-TS3d** show a higher energy TS with a bulkier group projecting towards the dimer chain.

## Enthalpy profile for polymerisation

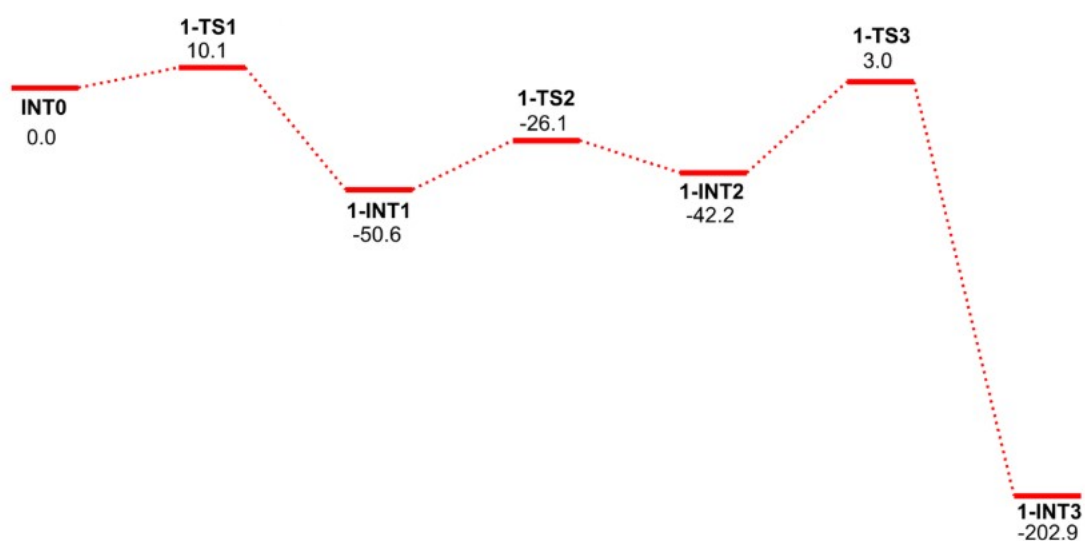

**Figure S32.** Enthalpy profile for polymerisation reaction. Energies in  $\text{kJ mol}^{-1}$ .



## NBO calculations

NBO (v3.1)<sup>18</sup> was used to analyse the nature of **1-INT2** following SPE calculation using  $\omega$ B97X-D/6-311++G(d,p). Second order analysis revealed strong interactions between the C=C  $\pi$  bond of styrene and AOs on Al suggesting the structure is more accurately described as a  $\pi$ -complex than a species with an Al-C  $\sigma$  bond.

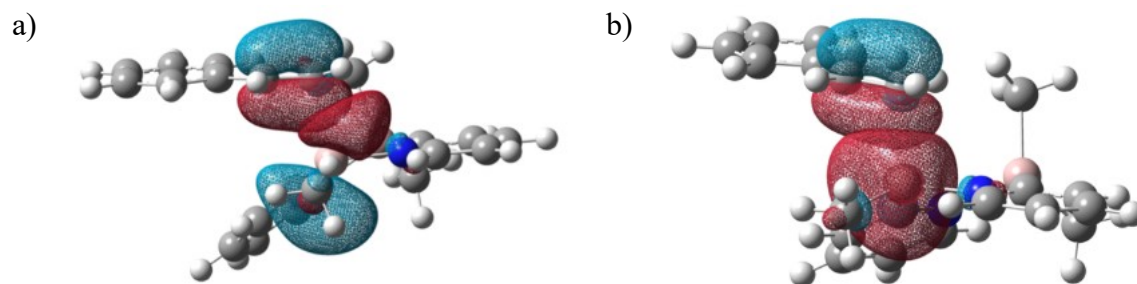

**Figure S33.** Overlap of the C=C  $\pi$  NBO with a) Al p NAO, b) Al s NAO

Relevant NBO output:

| Donor NBO              | Acceptor NBO   | E(2) kcal/mol |
|------------------------|----------------|---------------|
| 38. BD (2) C 18 – C 19 | 96. LP*(1)Al 8 | 42.34         |
| 38. BD (2) C 18 - C 19 | 98. LP*(3)Al 8 | 29.24         |

## Scans for barrierless steps

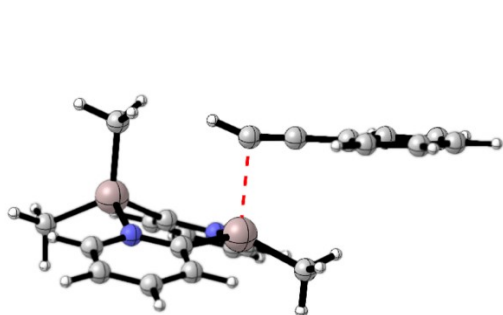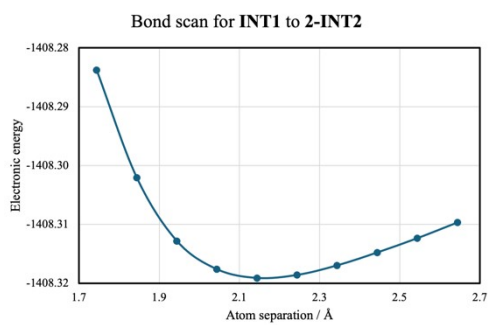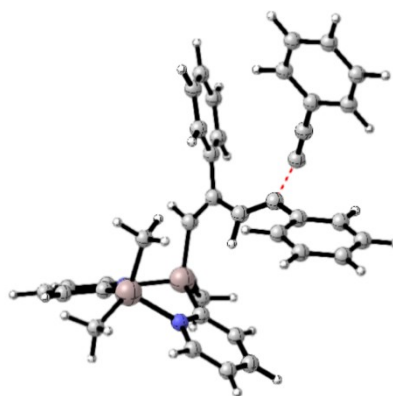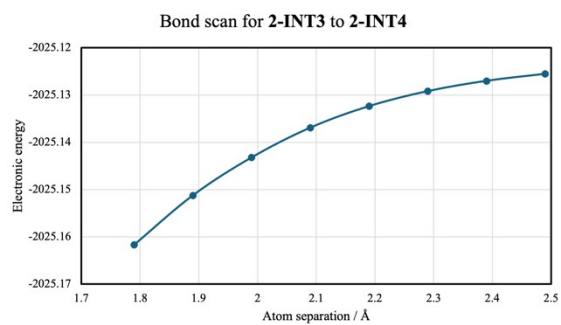

## Ring closing

A conformational search of **2-INT4** was carried out using MacroModel and distances between atoms 18, 69 and 18, 70 were calculated. The low energy conformer with distances less than 4 Å was selected for DFT optimisation. \*Conformer 3 required a ring flip of the catalyst structure centre and was ignored.

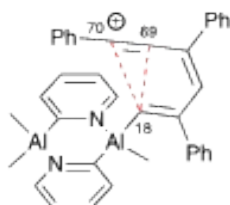

| Relative Potential Energy- |                              |                |                |
|----------------------------|------------------------------|----------------|----------------|
| Conformer #                | S-OPLS/ kJ mol <sup>-1</sup> | Distance 18-69 | Distance 18-70 |
| 1                          | 0                            | 4.082          | 5.421          |
| 2                          | 0.608                        | 4.083          | 5.424          |
| 3*                         | 1.701                        | 3.508          | 4.814          |
| <b>4</b>                   | <b>1.771</b>                 | <b>3.575</b>   | <b>4.876</b>   |
| 5                          | 1.820                        | 3.602          | 4.914          |
| 6                          | 1.923                        | 3.445          | 4.745          |
| 7                          | 2.002                        | 3.715          | 5.033          |
| 8                          | 2.477                        | 3.791          | 5.114          |
| 9                          | 3.202                        | 3.952          | 5.192          |
| 10                         | 3.348                        | 3.929          | 5.117          |
| 11                         | 3.932                        | 3.670          | 4.846          |
| 12                         | 4.224                        | 3.367          | 4.520          |

|    |        |       |       |
|----|--------|-------|-------|
| 13 | 4.515  | 3.550 | 4.857 |
| 14 | 4.546  | 3.668 | 4.817 |
| 15 | 5.003  | 3.544 | 4.853 |
| 16 | 5.229  | 4.038 | 5.376 |
| 17 | 5.676  | 3.488 | 3.735 |
| 18 | 5.835  | 3.934 | 5.272 |
| 19 | 6.012  | 3.791 | 5.119 |
| 20 | 6.079  | 4.004 | 5.344 |
| 21 | 6.281  | 4.017 | 3.822 |
| 22 | 6.762  | 3.872 | 5.204 |
| 23 | 6.834  | 4.013 | 5.352 |
| 24 | 7.665  | 4.028 | 3.811 |
| 25 | 9.078  | 3.512 | 4.830 |
| 26 | 9.810  | 3.483 | 4.692 |
| 27 | 10.910 | 3.574 | 3.966 |
| 28 | 11.061 | 3.479 | 4.588 |
| 29 | 11.166 | 3.420 | 3.510 |
| 30 | 11.340 | 3.455 | 4.662 |
| 31 | 12.328 | 3.444 | 3.672 |
| 32 | 12.651 | 3.542 | 3.920 |
| 33 | 12.862 | 4.042 | 3.835 |
| 34 | 13.255 | 3.997 | 3.757 |
| 35 | 13.817 | 3.585 | 3.792 |
| 36 | 14.295 | 3.412 | 4.527 |

|    |        |       |       |
|----|--------|-------|-------|
| 37 | 14.516 | 3.575 | 4.716 |
| 38 | 15.169 | 4.252 | 4.139 |
| 39 | 15.577 | 4.244 | 4.155 |
| 40 | 16.374 | 3.493 | 3.550 |
| 41 | 17.050 | 4.220 | 4.162 |
| 42 | 17.095 | 4.166 | 5.461 |
| 43 | 17.440 | 4.245 | 4.186 |
| 44 | 18.456 | 3.464 | 4.754 |
| 45 | 19.200 | 3.888 | 5.218 |
| 46 | 19.219 | 4.130 | 5.467 |
| 47 | 19.541 | 3.757 | 4.489 |
| 48 | 19.552 | 3.519 | 4.788 |
| 49 | 20.312 | 3.827 | 5.154 |
| 50 | 20.628 | 3.457 | 4.641 |

## Alternative regioselectivity

| Carbene insertion leading to 1,2,4 product (2-TS3)                                 | Carbene insertion leading to 1,3,5 product                                          |
|------------------------------------------------------------------------------------|-------------------------------------------------------------------------------------|
| 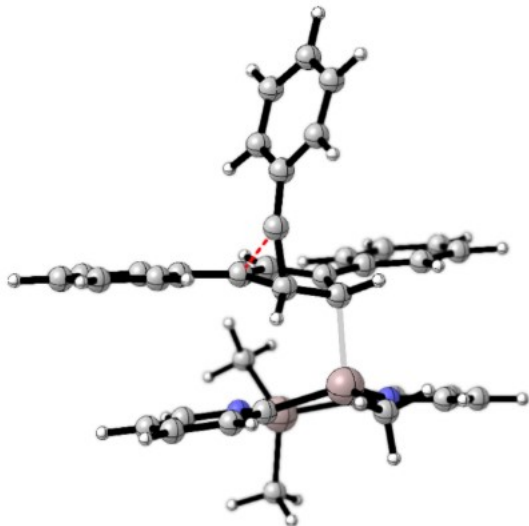 |  |
| E = -2025.263689                                                                   | E = -2025.262613                                                                    |

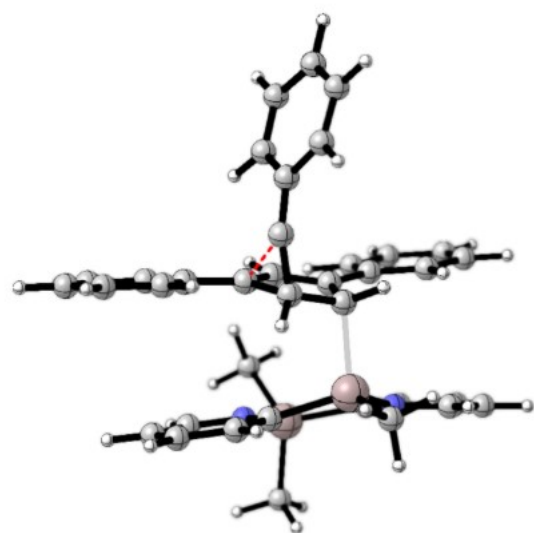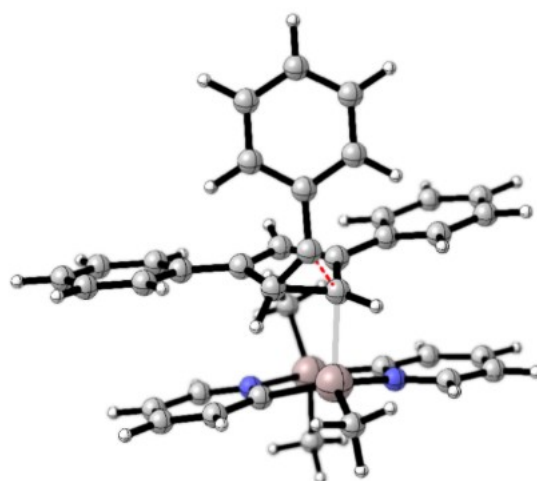

Energies calculated at B3LYP-D3-6-31G(d) level

## Geometry of alkene

Geometry optimisation and single point energy calculated at B3LYP/6-31G(d) level.

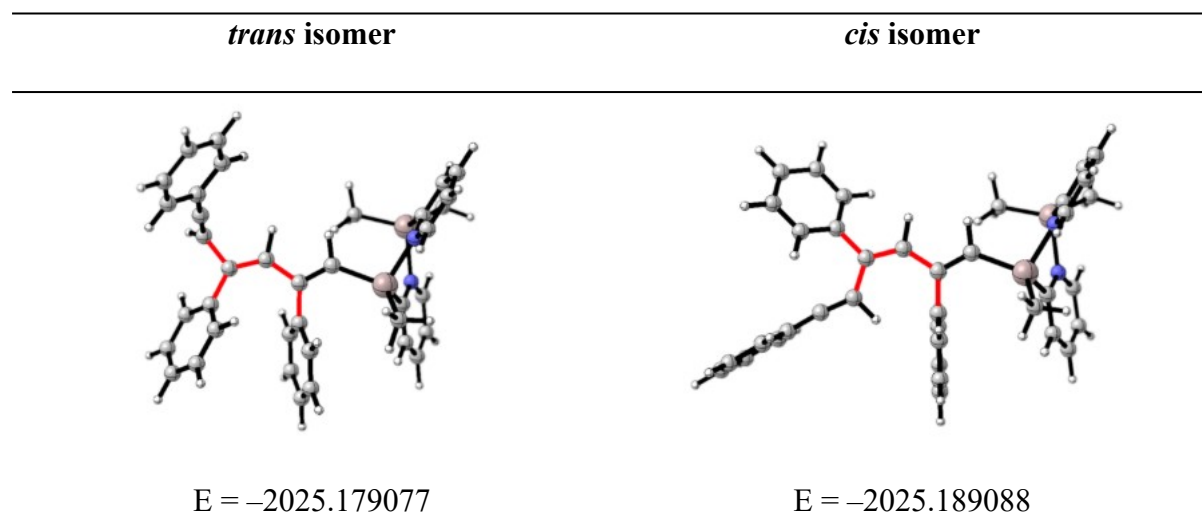

## Trimerisation pathway reproduced

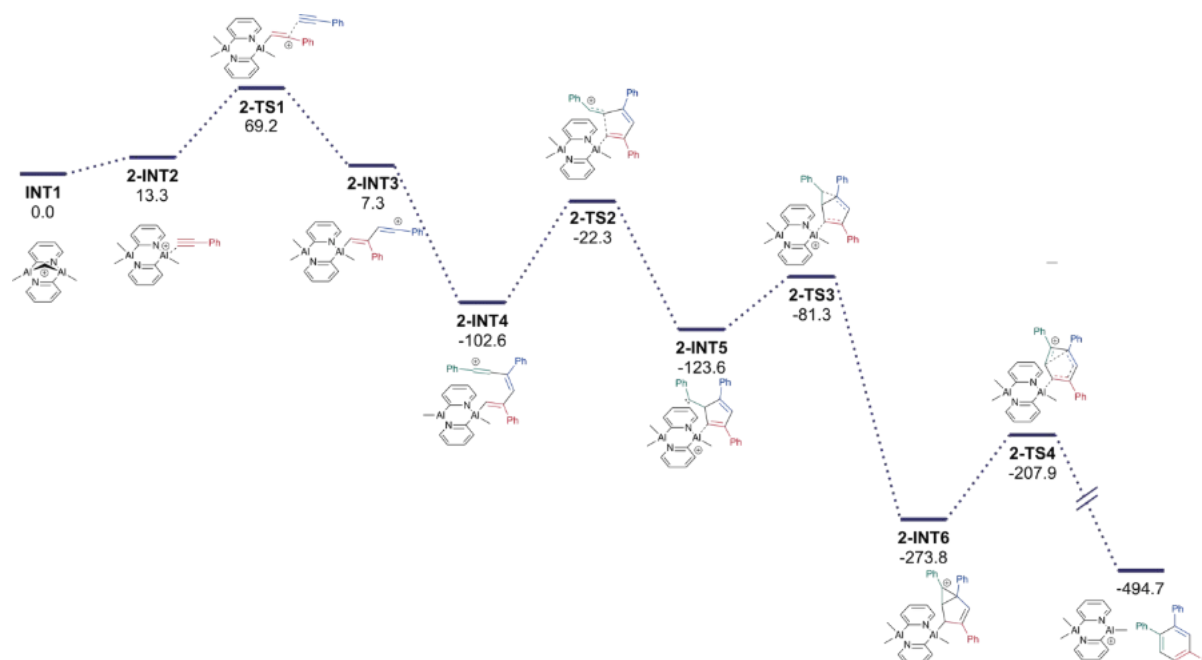

## Elimination pathway

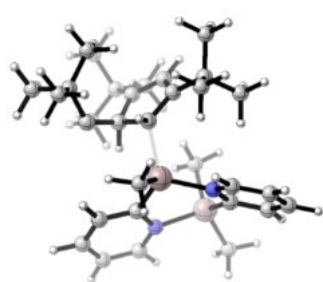

t\_butyl\_carbene

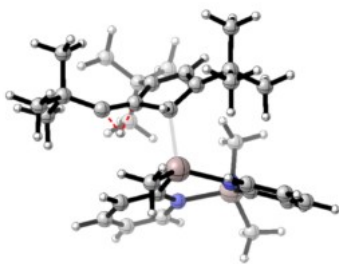

t\_butyl\_h\_shift\_ts

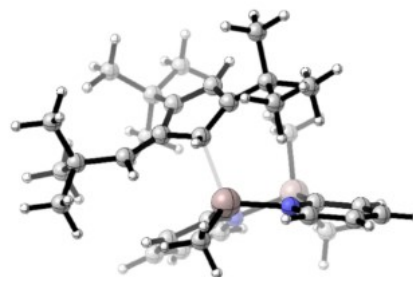

t\_butyl\_fulvene

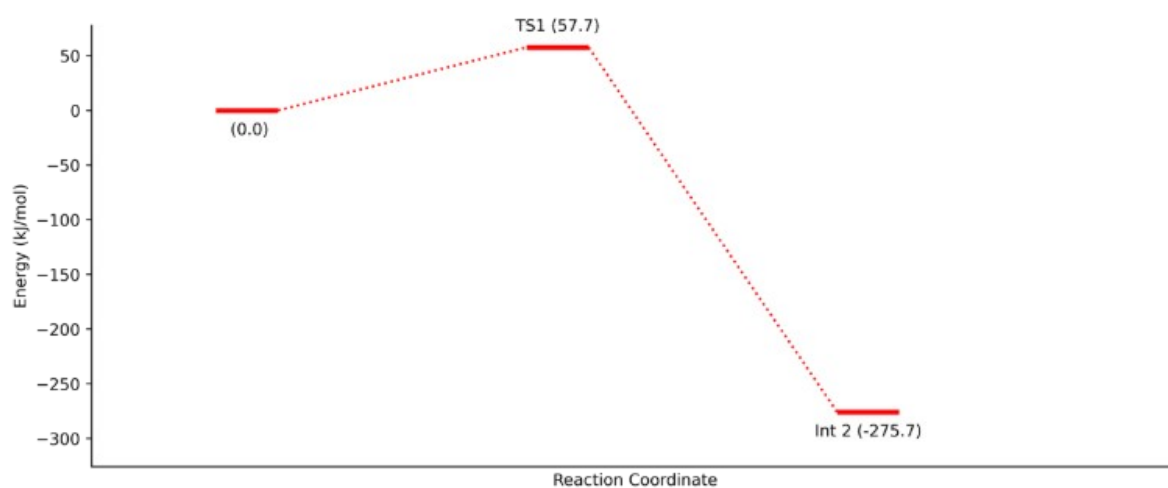

**Figure S34.** Free energy profile for 1,2-H shift step in formation of fulvene product in t-butylacetylene trimerisation.



## Structure of Apollo repository

Output files for DFT calculations are deposited in an Apollo repository<sup>19</sup> at

<https://doi.org/10.17863/CAM.121268>.

- └─ Acetylene\_trimerisation
  - | └─ 01\_INT1.out
  - | └─ 02\_2-INT2.out
  - | └─ 03\_2-TS1.out
  - | └─ 04\_2-INT3.out
  - | └─ 05\_2-INT4.out
  - | └─ 06\_2-TS2.out
  - | └─ 07\_2-INT5.out
  - | └─ 08\_2-TS3.out
  - | └─ 09\_2-INT6.out
  - | └─ 10\_2-TS4.out
  - | └─ 124\_triphenylbenzene\_reference.out
- └─ SI
  - | └─ 135\_carbene\_insertion.out
  - | └─ Elimination\_pathway
    - | └─ t\_butyl\_carbene.out
    - | └─ t\_butyl\_fulvene.out
    - | └─ t\_butyl\_h\_shift\_ts.out
  - | └─ FIA
    - | └─ AlCl3\_F.out
    - | └─ AlCl3.out
    - | └─ CF2O\_F.out
    - | └─ CF2O.out
    - | └─ INT1\_F.out
    - | └─ INT1.out
    - | └─ trityl\_F.out
    - | └─ trityl.out
  - | └─ Geometry\_alkene

- | | | └─ E\_geometry\_trimer.out
- | | └─ Z\_geometry\_trimer.out
- | └─ INT1\_nbo.out
- | └─ Scans\_for\_barrierless\_steps
- | | └─ scan\_2-INT3\_to\_2-INT4.out
- | | └─ scan\_INT1\_to\_2-INT2.out
- | └─ Stereochemistry\_chain\_transfer
- | | └─ SI-TS3a.out
- | | └─ SI-TS3b.out
- | | └─ SI-TS3c.out
- | | └─ SI-TS3d.out
- | └─ Stereochemistry\_TS3
- | | └─ 1-TS3a.out
- | | └─ 1-TS3a\_prime.out
- | | └─ 1-TS3b.out
- | | └─ 1-TS3b\_prime.out
- | | └─ 1-TS3\_geom.out
- | | └─ 1-TS3\_prime\_geom.out
- | └─ Styrene\_polymerisation
- | | └─ 1\_1-INT1.out
- | | └─ 2\_1-TS1.out
- | | └─ 3\_1-INT2.out
- | | └─ 4\_1-TS2.out
- | | └─ 5\_1-INT2.out
- | | └─ 6\_1-TS3.out
- | | └─ 7\_1-INT3.out

## References

1. C. Xi, Z. Sun and Y. Liu, *Dalton Trans.*, 2013, **42**, 13327–13330
2. M. J. Frisch, G. W. Trucks, H. B. Schlegel, G. E. Scuseria, M. A. Robb, J. R. Cheeseman, G. Scalmani, V. Barone, G. A. Petersson, H. Nakatsuji, X. Li, M. Caricato, A. V. Marenich, J. Bloino, B. G. Janesko, R. Gomperts, B. Mennucci, H. P. Hratchian, J. V. Ortiz, A. F. Izmaylov, J. L. Sonnenberg, D. Williams-Young, F. Ding, F. Lipparini, F. Egidi, J. Goings, B. Peng, A. Petrone, T. Henderson, D. Ranasinghe, V. G. Zakrzewski, J. Gao, N. Rega, G. Zheng, W. Liang, M. Hada, M. Ehara, K. Toyota, R. Fukuda, J. Hasegawa, M. Ishida, T. Nakajima, Y. Honda, O. Kitao, H. Nakai, T. Vreven, K. Throssell, J. A. Montgomery, Jr., J. E. Peralta, F. Ogliaro, M. J. Bearpark, J. J. Heyd, E. N. Brothers, K. N. Kudin, V. N. Staroverov, T. A. Keith, R. Kobayashi, J. Normand, K. Raghavachari, A. P. Rendell, J. C. Burant, S. S. Iyengar, J. Tomasi, M. Cossi, J. M. Millam, M. Klene, C. Adamo, R. Cammi, J. W. Ochterski, R. L. Martin, K. Morokuma, O. Farkas, J. B. Foresman, and D. J. Fox, Gaussian 16, Revision B.01, Gaussian, Inc., Wallingford CT, 2016.
3. A. D. Becke, *Phys. Rev. A*, 1988, **38**, 3098–310.
4. C. Lee, W. Yang and R. G. Parr, *Phys. Rev. B*, 1988, **37**, 785–789.
5. A. D. Becke, *J. Chem. Phys.*, 1993, **98**, 5648–5652.
6. S. Grimme, S. Ehrlich and L. Goerigk, *J. Comput. Chem.*, 2011, **32**, 1456–1465.
7. J.-D. Chai and M. Head-Gordon, *Phys. Chem. Chem. Phys.*, 2008, **10**, 6615–6620.
8. Schrödinger Release 2024-3: Maestro, Schrödinger, LLC, New York, NY, 2021.
9. CYLview, 20; Legault, C. Y., Université de Sherbrooke, 2020 (<http://www.cylview.org>).
10. (a) F. Neese, *WIREs Comput. Molec. Sci.*, 2025, **15**, e70019; (b) F. Neese, *J. Comput. Chem.*, 2023, **44**, 381–396
11. Y.-S. Lin, G.-D. Li, S.-P. Mao and J.-D. Chai, *J. Chem. Theory Comput.*, 2013, **9**, 263–272.
12. F. Weigend and R. Ahlrichs, *Phys. Chem. Chem. Phys.*, 2005, **7**, 3297–3305.
13. S. Grimme, J. Antony, S. Ehrlich and H. Krieg, *J. Chem. Phys.*, 2010, **132**, 154104
14. (a) T. Lu and F. Chen, *J. Comput. Chem.*, 2012, **33**, 580–592; (b) T. Lu, *J. Chem. Phys.*, 2024, **161**, 082503.
15. T. Lu and F. Chen, *J. Mol. Graph. Model.*, 2012, **38**, 314–323.
16. E. C. Meng, T. D. Goddard, E. F. Pettersen, G. S. Couch, Z. J. Pearson, J. H. Morris and T. E. Ferrin, *Protein Sci.*, 2023, **32**, e4792.
17. (a) L. Falivene, R. Credendino, A. Poater, A. Petta, L. Serra, R. Oliva, V. Scarano and L. Cavallo, *Organometallics*, 2016, **35**, 2286–2293; (b) L. Falivene, Z. Cao, A. Petta, L. Serra, A. Poater, R. Oliva, V. Scarano and L. Cavallo, *Nat. Chem.*, 2019, **11**, 872–879.
18. NBO Version 3.1, E. D. Glendening, A. E. Reed, J. E. Carpenter, and F. Weinhold.
19. Choudhury, D., Danylyuk, R., Terzopoulos, A., Potter, N., Scherman, O., Goodman, J., & Wright, D. (2025). Research data supporting “Oligomerisation and Stereoselective Polymerisation of Alkenes and Alkynes Using Pyridyl-based Al(III) Catalysts”. Apollo - University of Cambridge Repository. <https://doi.org/10.17863/CAM.121268>.
